1

**Full Title:**

2

**RAB-35 aids apoptotic cell clearance by regulating cell corpse recognition and**

3

**phagosome maturation**

4

5

**Short Title:**

6

**Regulation of cell corpse recognition and phagosome maturation by RAB-35**

7

8

Ryan C. Haley<sup>1</sup>, Ying Wang<sup>1</sup>, and Zheng Zhou<sup>1,2</sup>

9

10

<sup>1</sup>Verna and Marris McLean Department of Biochemistry and Molecular Biology, Baylor College

11

of Medicine, Houston, TX 77030

12

13

<sup>2</sup>Corresponding author, [zhengz@bcm.tmc.edu](mailto:zhengz@bcm.tmc.edu), 713-798-6489

14

15

16

17

18

19

20

21

22

23

24

25

26

27 **Abstract:**

28           In metazoans, apoptotic cells are swiftly engulfed by phagocytes and degraded  
29 inside phagosomes. Multiple small GTPases in the Rab family are known to function in  
30 phagosome maturation by regulating vesicle trafficking. We discovered *rab-35* as a new  
31 gene important for apoptotic cell clearance using an RNAi screen targeting putative Rab  
32 GTPases in *Caenorhabditis elegans*. We further identified TBC-10 as a putative GTPase-  
33 activating protein (GAP), and FLCN-1 and RME-4 as two putative Guanine Nucleotide  
34 Exchange Factors (GEFs), for RAB-35. RAB-35 function was found to be required for  
35 the incorporation of early endosomes to phagosomes and for the timely degradation of  
36 apoptotic cell corpses. More specifically, RAB-35 facilitates the switch of phagosomal  
37 membrane phosphatidylinositol species from PtdIns(4,5)P<sub>2</sub> to PtdIns(3)P and promotes  
38 the recruitment of the small GTPase RAB-5 to phagosomal surfaces, processes that are  
39 essential for phagosome maturation. Interestingly, we observed that CED-1 performs  
40 these same functions, and to a much larger extent than RAB-35. Remarkably, in addition  
41 to cell corpse degradation, RAB-35 also facilitates the recognition of cell corpses  
42 independently of the CED-1 and CED-5 pathways. RAB-35 localizes to extending  
43 pseudopods and is further enriched on nascent phagosomes, consistent with its dual roles  
44 in regulating cell corpse-recognition and phagosome maturation. Epistasis analyses  
45 indicate that *rab-35* represents a novel third genetic pathway that acts in parallel to both  
46 of the canonical *ced-1/6/7* and *ced-2/5/10/12* engulfment pathways. We propose that  
47 RAB-35 acts as a robustness factor, leading a pathway that aids the canonical pathways  
48 for the engulfment and degradation of apoptotic cells.

49

## 50 **Introduction:**

51           During the development of metazoans, cells that undergo apoptosis are  
52 internalized and degraded by other cells that are referred to as engulfing cells or  
53 phagocytes (1–3). The phagocytic removal of apoptotic cells is an evolutionarily  
54 conserved event that supports normal tissue turnover and homeostasis, facilitates wound  
55 resolution and tissue regeneration, and prevents inflammatory and auto-immune  
56 responses induced by the release of dead cell contents (3,4). Throughout the  
57 development of *Caenorhabditis elegans* hermaphrodites, 300-500 of germ cells and 131  
58 somatic cells undergo apoptosis (5–7). The temporal and spatial parameters of these cell  
59 death events are highly consistent between embryos (5). Apoptotic cells exhibit a  
60 “button-like” and highly refractive morphology under the Differential Interference  
61 Contrast (DIC) microscope, and are rapidly engulfed and degraded by multiple types of  
62 neighboring cells (5–8). Genetic screens and further characterizations of mutations that  
63 result in the “*cell death abnormal*” (*Ced*) phenotype, characterized by the accumulation of  
64 persistent cell corpses, have identified a number of genes that act in the recognition,  
65 engulfment, or degradation of cell corpses (9,10).

66           The Rab family of small GTPases play critical roles in membrane trafficking  
67 events, including endocytosis and exocytosis, autophagy, and phagosome maturation  
68 (11,12). A well-known mode of action is that Rab GTPases and their effectors serve as  
69 docking factors that facilitate the attachment and fusion of different membrane  
70 compartments and/or vesicles (11). Multiple mammalian and *C. elegans* Rab proteins  
71 play essential roles for phagosome maturation by facilitating the incorporation of  
72 intracellular organelles to phagosomes, an action that delivers digestive enzymes to the

73 phagosomal lumen and that may also aid in the acidification of the lumen (13,14). *C.*  
74 *elegans* and mammalian RAB-5 are required for the recruitment and incorporation of  
75 early endosomes to phagosomes (15–17), while *C. elegans* and mammalian RAB-7 are  
76 critical for the incorporation of lysosomes to phagosomes (18,19). In *C. elegans*, both  
77 RAB-5 and RAB-7 function downstream of a signaling pathway that promotes  
78 phagosome maturation; this pathway is initiated by the phagocytic receptor CED-1 and  
79 mediated by the large GTPase DYN-1 (8,15,18,20). *C. elegans* RAB-2 and RAB-14 also  
80 make important contributions to the phagosomal degradation of cell corpses (21–23).

81         The signaling pathway led by CED-1 initiates phagosome maturation not only by  
82 recruiting Rab proteins to phagosomal surfaces, but also by initiating the production of  
83 PtdIns(3)P, a phosphorylated phosphatidylinositol species and an important second  
84 messenger, on phagosomal membranes (16,18). PtdIns(3)P recruits multiple effectors to  
85 phagosomes, including membrane remodeling factors and docking factors that facilitate  
86 the recruitment and fusion of intracellular vesicles (13,24). Consequently, phagosome  
87 maturation events are largely dependent on the presence of PtdIns(3)P and certain Rab  
88 GTPases (15,16). Interestingly, the presence of RAB-5 and PtdIns(3)P on phagosomal  
89 surfaces displays a co-dependent relationship (15,16).

90         Two PI3-kinases, PIKI-1 and VPS-34, catalyze the production of PtdIns(3)P on  
91 phagosomal surfaces (16,25). PIKI-1 and VPS-34 are functionally opposed by MTM-1,  
92 a PI3-phosphatase that dephosphorylates PtdIns(3)P and in this matter counteracts PI3-  
93 kinase activities (16). Throughout the phagosome maturation process, PtdIns(3)P is  
94 present on phagosomal surfaces in a two-wave oscillation pattern, a pattern coordinately  
95 regulated by PIKI-1, VPS-34, and MTM-1 (16). MTM-1 is recruited to the surface of



96 extending pseudopods as an effector of PtdIns(4,5)P<sub>2</sub>, another phosphorylated  
97 phosphatidylinositol species that is enriched on the surface of growing pseudopods  
98 during engulfment (25). The initial appearance of PtdIns(3)P on phagosomes correlates  
99 not only with the recruitment of PIKI-1 to phagosomal surfaces by the CED-1 pathway  
100 (16), but also with the simultaneous disappearance of MTM-1 from nascent phagosomes,  
101 which is implicated to be a result of the disappearance of PtdIns(4,5)P<sub>2</sub> from phagosomal  
102 surfaces (25). Whether the CED-1 signaling pathway also regulates the turnover of  
103 PtdIns(4,5)P<sub>2</sub> has not yet been tested.

104         The phagocytic receptor CED-1 provides a link between the engulfment of  
105 apoptotic cells and the subsequent maturation of nascent phagosomes (8). During  
106 engulfment, CED-1 recognizes phosphatidylserine (PS), an “eat me” signal exposed on  
107 the surface of apoptotic cells, and defines one of the two canonical parallel pathways that  
108 stimulate pseudopod extension and cell corpse internalization (26–28). Several other key  
109 components act in this engulfment pathway alongside CED-1: CED-7, a homolog of  
110 mammalian ABC transporters that exposes PS on the surface of apoptotic cells; CED-6,  
111 an adaptor for CED-1; and DYN-1, an ortholog of the large GTPase dynamin that  
112 promotes “focal exocytosis” during pseudopod extension and stabilizes the cytoskeleton  
113 underneath extending pseudopods in response to CED-1 activation (8,29,30). In the other  
114 canonical engulfment pathway, CED-2 regulates the activity of the CED-5/CED-12  
115 complex, presumably through its N-terminus that contains SH2 and SH3 domains  
116 (31,32). The CED-5/CED-12 complex, in turn, functions as a bipartite nucleotide  
117 exchange factor to activate the Rac GTPase CED-10 (33). CED-10 promotes the  
118 reorganization of the actin cytoskeleton and the extension of pseudopods around cell

119 corpses (34,35). However, residual engulfment activity persists after inactivating both  
120 the *ced-1/-6/-7/dyn-1* and *ced-2/-5/-10/-12* pathways, suggesting that there are yet  
121 unknown pathways that play significant roles in cell-corpse engulfment (8,36). Although  
122 other proteins – such as alpha and beta integrins – are also reported to contribute to cell  
123 corpse engulfment, their effects are mild in comparison (37,38).

124         In addition to the putative missing pathways, many other ambiguities still  
125 surround the molecular mechanisms that control apoptotic cell clearance. For example,  
126 although many Rab GTPases have been implicated in the regulation of any clearance  
127 events, it remains unclear whether this is an exhaustive list. The *C. elegans* genome  
128 contains 30 genes that encode close homologs of mammalian Rab GTPases, 23 of which  
129 have been assigned names as *rab* genes (39). To determine which of these *rab* genes  
130 function in apoptotic cell clearance, we screened for any Rab GTPases that participate in  
131 cell corpse clearance using RNAi knockdown, excluding previously examined candidates  
132 such as *rab-2*, *-5*, *-7*, and *-14*. We discovered that inactivation of *rab-35*, which encodes  
133 a homolog of mammalian Rab35, caused a moderate yet significant Ced phenotype,  
134 indicating that RAB-35 functions in apoptotic cell clearance. Further characterizations  
135 revealed novel features and functions of RAB-35. Unlike RAB-5 and RAB-7, which are  
136 enriched on the surface of phagosomes and facilitate specific maturation events, RAB-35  
137 weakly localizes at the extending pseudopods during engulfment, exhibits an ephemeral  
138 surge of localization on nascent phagosomes, and regulates multiple steps throughout  
139 apoptotic cell clearance. To facilitate the initiation of phagosome maturation, RAB-35  
140 promotes the turnover of PtdIns(4,5)P<sub>2</sub> and the recruitment of RAB-5, indirectly enabling  
141 phagosomal PtdIns(3)P production. Our findings further indicate that RAB-35 represents

142 a clearance pathway that functions in parallel to the CED-1 and CED-5 pathways, yet in  
143 many ways resembles the mechanisms and functions of the CED-1 pathway. We thus  
144 propose that RAB-35 acts as a robustness factor and defines a new pathway that ensures  
145 the stability of apoptotic cell clearance.

146

## 147 **Results:**

### 148 Inactivation of *rab-35* results in an increased number of persistent cell corpses

149 The *C. elegans* genome contains 30 genes that encode close homologs of  
150 mammalian Rab GTPases, 23 of which have been assigned gene names (40). Among  
151 these 23 putative *rab* genes, *rab-2*, *rab-5*, *rab-7*, and *rab-14* have been reported to act in  
152 the clearance of apoptotic cells (13). To determine if any other Rab proteins are involved  
153 in the same process, we individually knocked down the expression of 19 *rab* genes in *C.*  
154 *elegans* using the RNA interference (RNAi) treatment, and scored the number of germ  
155 cell corpses in the gonad of adult hermaphrodites (Materials and Methods). In addition,  
156 we scored the number of germ cell corpses in the *rab-10* deletion mutant (Materials and  
157 Methods). RNAi of *rab-1* and *rab-11.1* cause lethality before the worms develop into  
158 adults. Among the remaining 17 genes subject to RNAi treatment and the *rab-*  
159 *10(ok1494)* mutants, only 6 had more than four times the number of germ cell corpses  
160 compared to the wild-type control (Fig 1A). Of these 6, *rab-35*(RNAi) worms exhibited  
161 the highest number of persistent germ cell corpses, indicating the strongest defect in the  
162 clearance of germ cell corpses, characteristic of the Ced phenotype (Fig 1A). To verify  
163 this Ced phenotype, we examined two putative *rab-35* null alleles – the nonsense

164 mutation *b1013* and the deletion allele *tm2058* (Fig 1B) (41). Both *rab-35(b1013)* and  
165 *rab-35(tm2058)* mutants exhibit identical Ced phenotypes in embryos in mid- (1.5-fold,  
166 ~420 min-post 1<sup>st</sup> cleavage) and late- (late 4-fold, 700-800 min-post 1<sup>st</sup> cleavage) stage  
167 embryos and the 48 hour post-L4 adult gonads (Fig. 1C-D), confirming the RNAi results.

168 To determine whether the button-like objects observed under DIC optics in *rab-*  
169 *35(b1013)* mutants are actually cell corpses, we probed them for the exposure of PS on  
170 their surfaces, a distinct characteristic of cells undergoing apoptosis (27). Using MFG-  
171 E8::mCherry – a secreted PS-binding reporter (27), we detected bright mCherry signal  
172 specifically on the surface of the button-like objects (Fig 1E), indicating that they are  
173 indeed apoptotic cells. In addition, we expressed the *rab-35* cDNA, as an N-terminal  
174 GFP-tagged form, specifically in engulfing cells under the control of the *ced-1* promoter  
175 ( $P_{ced-1} \text{ } gfp::rab-35$ ) (26), and found that it completely rescued the Ced phenotype in *rab-*  
176 *35(b1013)* mutants (Fig 1F). This result suggests that the activity of RAB-35 in  
177 engulfing cells promotes cell corpse clearance.

178 RAB-35 is known to act in receptor-mediated endocytosis and endocytic  
179 recycling in *C. elegans* (41,42). We confirmed that the *rab-35* mutants have a  
180 characteristic excess of yolk in the pseudocoelom due to their inability to traffic yolk into  
181 oocytes as previously described (41,42) (Fig S1).

182

183 RAB-35 localizes to developing pseudopods and must cycle between GDP- and GTP-  
184 bound states to function

185           Using time-lapse microscopy, we monitored the localization of GFP::*RAB-35*  
186 expressed in engulfing cells (*P<sub>ced-1</sub>gfp::*rab-35**), which rescues the Ced phenotype of *rab-*  
187 *35(b1013)* mutants. We tracked the clearance process of three apoptotic cells on the  
188 ventral surface: C1, engulfed by ABplaappa; C2, engulfed by ABpraappa; and C3,  
189 engulfed by ABplaapppp, using our previously established protocol (Fig 2A) (43). C1,  
190 C2, and C3 undergo apoptosis shortly after the initiation of ventral enclosure (~320-330  
191 minutes post-first cleavage) (43). GFP::*RAB-35* labels the extending pseudopods  
192 throughout engulfment; moreover, GFP::*RAB-35* exhibits an ephemeral burst of  
193 enrichment on nascent phagosomes that lasts for 2-4 minutes (Fig 2B). Afterwards, the  
194 phagosomal GFP signal rapidly declines to the background level by approximately 15-20  
195 minutes after the initiation of engulfment (Fig 2C). This dynamic enrichment pattern  
196 suggests that *RAB-35* might participate in multiple events during apoptotic cell  
197 clearance.

198           We introduced S24N and Q69L, two point mutations previously established to  
199 convert Rab GTPases into the GDP-locked and GTP-locked forms (41), respectively,  
200 individually into the *P<sub>ced-1</sub>gfp::*rab-35** reporter constructs. Overexpression of *RAB-*  
201 *35(S24N)* produced a Ced phenotype in the wild-type background as strong as that  
202 displayed by *rab-35* null mutants (Fig 2D), verifying its predicted dominant-negative  
203 effect (41). Moreover, GFP::*RAB-35(S24N)* failed to enrich on the surfaces of extending  
204 pseudopods or nascent phagosomes (Fig 2E), suggesting that it is a non-functional form.  
205 Remarkably, overexpression of *RAB-35(Q69L)*, the presumed GTP-locked form, failed  
206 to rescue the Ced phenotype of *rab-35* mutants (Fig 2D), although it displayed persistent  
207 enrichment on the phagosomal membrane (Fig 2E). Together, the altered localization

208 patterns and the lack of rescuing activity observed in both mutant forms of RAB-35  
209 suggest that the cycling of RAB-35 between the GDP-bound and GTP-bound states is  
210 required for its proper localization and function during apoptotic cell clearance.

211

## 212 Determining the putative GAP and GEFs for RAB-35 for apoptotic cell clearance

213 To better understand how the cycling of RAB-35 between the GDP- and GTP-  
214 bound forms is regulated, we examined *C. elegans* orthologs of known GAPs and GEFs  
215 of mammalian Rab35 to determine which ones function in the context of apoptotic cell  
216 clearance. We first studied the loss-of-function alleles of *rme-4* and *flcn-1*, which encode  
217 the *C. elegans* orthologs of the mammalian GEFs connecdenns 1/2/3 and folliculin,  
218 respectively (44). The *flcn-1(ok975)* null mutation resulted in a Ced phenotype that is  
219 slightly weaker than that of *rab-35(b1013)* mutants (Fig 2F). Furthermore, the *flcn-*  
220 *1(ok975); rab-35(b1013)* double mutants exhibited a Ced phenotype identical to that of  
221 *rab-35(b1013)* mutants, placing both *flcn-1* and *rab-35* in the same genetic pathway (Fig  
222 2F). These results suggest that *flcn-1* might act as a GEF for RAB-35, but also that it  
223 may be working in tandem with another GEF.

224 RME-4 was previously reported to act as a GEF for RAB-35 during its function in  
225 endocytic trafficking (41). Interestingly, although *rme-4(tm1865)* single mutants did not  
226 exhibit any statistically significant Ced phenotype, the *flcn-1(ok975); rme-4(tm1865)*  
227 double mutants exhibited a Ced phenotype more severe than that displayed by the *flcn-*  
228 *1(ok975)* single mutants and identical in severity to that of *rab-35(b1013)* mutants (Fig  
229 2F), suggesting that RME-4 might also function as a GEF for RAB-35 in the context of

230 apoptotic cell clearance. Compared to FLCN-1, however, the contribution of RME-4 to  
231 apoptotic cell clearance is relatively minor and redundant.

232 We subsequently probed deletion mutant alleles of the genes *tbc-7*, *tbc-10*, and  
233 *tbc-13* ([www.wormbase.org](http://www.wormbase.org)), which encode the *C. elegans* orthologs of TBC1D24,  
234 TBC1D10A/B/C, and TBC1D13, known GAPs for mammalian Rab35, respectively (41)  
235 (Fig S2). We found considerable evidence that TBC-10 acts as the sole GAP for RAB-35  
236 in the context of cell corpse clearance. Firstly, a loss-of-function mutant of *tbc-10*, but  
237 not those of *tbc-7* or *tbc-13*, exhibits a Ced phenotype identical to that of *rab-35(b1013)*  
238 mutants (Fig 2G). These results are also consistent with our previous observation that  
239 RAB-35 must cycle between its GTP- and GDP-bound forms to function, as inactivating  
240 its putative GAP (*tbc-10*) also appears to disable RAB-35. If the GTP-locked form of  
241 RAB-35 was its active form, *tbc-10* mutants would instead lock RAB-35 in a  
242 constitutively active form and thus fail to exhibit a Ced phenotype. Secondly, when we  
243 tracked the localization of GFP::RAB-35 throughout the clearance of C1, C2, and C3 in  
244 *tbc-10* mutants, we found that – relative to wild-type – RAB-35 localized to extending  
245 pseudopods and nascent phagosomes normally, but that its removal from phagosomal  
246 surfaces was delayed (Fig 2H). This pattern is similar to that of GFP::RAB-35(Q69L) in  
247 a wild-type background (Fig 2E), indicating that GFP::RAB-35 is locked in the GTP-  
248 bound form in *tbc-10* mutants. Finally, the *tbc-10(tm2790); rab-35(b1013)* double  
249 mutants did not enhance the Ced phenotype over either single mutant, confirming that  
250 *tbc-10* is in the same genetic pathway as *rab-35*, as would be expected for a putative  
251 GAP for RAB-35 (Fig 2G).

252

253 *rab-35* loss of function causes delays in phagosomal maturation

254 *C. elegans* RAB-2, RAB-5, and RAB-7 all play important roles in the maturation  
255 of phagosomes that contain apoptotic cells (13). To determine whether RAB-35 is  
256 involved in this process, we measured how fast phagosomes degraded the cell corpses  
257 C1, C2, or C3 in *rab-35* mutant embryos. The lifetime of a phagosome is measured using  
258 a combination of a GFP::moesin reporter, which specifically labels the polymerized actin  
259 filaments underneath the extending pseudopods (28), and CTNS-1::mRFP, a lysosomal  
260 membrane marker that is enriched on the surface of phagosomes during maturation (18).  
261 These two reporters are co-expressed in engulfing cells under the control of the *P<sub>ced-1</sub>*  
262 promoter (18,28). GFP::moesin is used to determine when pseudopods fuse to form a  
263 nascent phagosome, providing a way to determine the time point when phagosomal  
264 maturation begins and to measure the initial diameter of a nascent phagosome. CTNS-  
265 1::mRFP is then used to track and measure the diameter of a phagosome throughout  
266 maturation (Fig 3A). We defined phagosomal lifetime as how long it takes for the  
267 phagosome to shrink to one-third of its original radius after the initiation of phagosome  
268 maturation. Using this assay, we found that *rab-35(b1013)* mutants exhibited a  
269 significantly longer phagosomal lifetime than their wild-type counterparts; 75% of  
270 phagosomes in *rab-35* mutants had a lifetime longer than 60 minutes, compared to only  
271 13.3% of phagosomes in wild-type embryos (Fig 3B). These results indicate that RAB-  
272 35 is important for the efficient degradation of phagosomal contents.

273

274 *rab-35* mutants are defective in the incorporation of early endosomes to phagosomes



275           During the degradation of cell corpses, two kinds of intracellular organelles –  
276 early endosomes and lysosomes – are recruited to the surface of phagosomes and  
277 subsequently fuse to the phagosomal membrane, depositing their contents into the  
278 phagosomal lumen (13). The recruitment and fusion of early endosomes to the  
279 phagosome was probed using HGRS-1::GFP, an established early endosomal surface  
280 marker expressed in engulfing cells (8). Starting from the birth of a nascent phagosome,  
281 HGRS-1::GFP appears on the surface of a phagosome as puncta (Fig 3D). The  
282 continuous accumulation of the puncta over time generates a GFP ring around the  
283 phagosomal surface (Fig 3D). In *rab-35* mutant embryos, this GFP ring appears much  
284 slower relative to wild-type embryos, suggesting that RAB-35 function is required for the  
285 efficient recruitment of early endosomes (Fig 3C-D).

286           Likewise, CTNS-1::mRFP was used to visualize the recruitment of lysosomes to  
287 the surface of phagosomes. CTNS-1::mRFP first appeared on phagosomal surfaces as  
288 puncta, with the accumulating puncta gradually forming a mRFP ring on the phagosomal  
289 surface over time (18). Time-lapse recording and quantitative analysis found that *rab-*  
290 *35(b1013)* mutants had no statistically significant delays in the recruitment of lysosomes  
291 (Fig S3B). To further determine if the fusion of lysosomes to phagosomes was normal in  
292 *rab-35* mutants, we monitored the entry of a NUC-1::mRFP reporter (expressed in  
293 engulfing cells under  $P_{ced-1}$ ) into the phagosomal lumen. NUC-1 is an endonuclease that  
294 specifically resides in the lysosomal lumen (45). Similar to CTNS-1::mRFP, NUC-  
295 1::mRFP is recruited to phagosomal surfaces as mRFP<sup>+</sup> puncta (45); however, unlike  
296 CTNS-1, the fusion of lysosomes to the phagosome causes NUC-1::mRFP to enter the  
297 phagosomal lumen (Fig S3A). In *rab-35(b1013)* embryos, the entry of the NUC-

298 1::mRFP signal occurred on an timescale identical to that of wild-type embryos,  
299 suggesting that inactivating *rab-35* has no effect on phagolysosomal fusion (Fig S3C).

300

301 RAB-35 promotes the initiation of phagosomal maturation by facilitating the  
302 PtdIns(4,5)P<sub>2</sub> to PtdIns(3)P shift

303 The rapid enrichment of RAB-35 during the formation of a nascent phagosome  
304 (Fig 2B) suggests that RAB-35 may function during the initiation of phagosome  
305 maturation. At this same time, the predominant phosphatidylinositol species on the  
306 phagosomal surface switches from PtdIns(4,5)P<sub>2</sub> to PtdIns(3)P, a process necessary for  
307 the progression of phagosome maturation and cell corpse degradation (16,18,28). We  
308 monitored the dynamic localization pattern of RAB-35 relative to those patterns of  
309 PtdIns(4,5)P<sub>2</sub> and PtdIns(3)P. This was done by co-expressing our own RAB-35  
310 reporters with previously established reporters for PtdIns(4,5)P<sub>2</sub> (PH::GFP) or PtdIns(3)P  
311 (2xFYVE::mRFP) (18,28) (Fig 4A-B). We observed that RAB-35 enrichment  
312 corresponded exactly with both the loss of PtdIns(4,5)P<sub>2</sub> and the gain of PtdIns(3)P on  
313 the surface of a nascent phagosome (Fig 4A-B).

314 Because PtdIns(3)P is essential for phagosome maturation (see Introduction), and  
315 because the disappearance of PtdIns(4,5)P<sub>2</sub> from phagosomal surfaces is correlated with  
316 the production of PtdIns(3)P on phagosomes (25), we examined whether RAB-35  
317 regulates the dynamic pattern of PtdIns(4,5)P<sub>2</sub> and PtdIns(3)P on phagosomes. We first  
318 monitored PtdIns(4,5)P<sub>2</sub> dynamics on the surface of phagosomes in a series of mutant  
319 embryos (Fig 4C). We found that in *rab-35(b1013)* and *ced-1(n1506)* mutants, but not

320 *ced-5(n1812)* mutants, PtdIns(4,5)P<sub>2</sub> persists longer on phagosomal surfaces (Fig 4C-D).  
321 *ced-1(n1506)* mutants exhibited a longer delay in PtdIns(4,5)P<sub>2</sub> disappearance than *rab-*  
322 *35(b1013)* mutants, and *rab-35(b1013); ced-1(n1506)* double mutants exhibited a much  
323 more severe delay than either single mutant (Fig 4D(a)). These results suggest that RAB-  
324 35 and CED-1 act in a partially redundant fashion for the removal of PtdIns(4,5)P<sub>2</sub> from  
325 phagosomal surfaces.

326 The phagocytic receptor CED-1 was previously demonstrated to play an essential  
327 role in initiating PtdIns(3)P synthesis on the surface of nascent phagosomes (18). In *rab-*  
328 *35* mutant embryos, the appearance of the initial peak of PtdIns(3)P was significantly  
329 delayed relative to wild-type, although the defect was not as strong as that observed in  
330 *ced-1* mutant embryos (Fig 5A+B(a)). *rab-35; ced-1* double mutants have a stronger  
331 delay in the PtdIns(3)P appearance compared to either single mutant (Fig 5B(a)), again  
332 suggesting that RAB-35 and CED-1 act in a partially redundant fashion for the generation  
333 of PtdIns(3)P on phagosomal surfaces. However, because *ced-5* mutants fail to exhibit  
334 any delay in PtdIns(3)P production, and because the severity of the delay of PtdIns(3)P  
335 displayed by the *rab-35; ced-5* double mutants is equivalent to that of the *rab-35* single  
336 mutants, we conclude that *ced-5* is not involved in the regulation of PtdIns(3)P  
337 production (Fig 5A+B(b)).

338 PtdIns(3)P typically appears on the phagosomal surface in two distinct waves (16),  
339 as exhibited in Figure 5A (time-lapse strip of a wild-type embryo, white and yellow  
340 arrows). We thus quantified whether the first and second waves of PtdIns(3)P were  
341 present in each of the aforementioned mutants. In stark contrast to wild-type embryos,  
342 where every phagosome exhibited both PtdIns(3)P waves, 21.7% of phagosomes in *rab-*

343 *35(b1013)* mutants failed to produce the first wave of PtdIns(3)P, while 33.3% of  
344 phagosomes in *ced-1(n1506)* mutants failed to produce either the first or second wave  
345 (Fig 5C). *rab-35(b1013); ced-1(n1506)* double mutants exhibited more severe defects  
346 than either single mutant (Fig 5C). Together, our observations indicate that RAB-35 and  
347 CED-1 act in parallel to promote the production of PtdIns(3)P on the surface of nascent  
348 phagosomes.

349

350 RAB-35 is required for the efficient removal of MTM-1 from phagosomal surfaces

351 To further explore how loss of function of *rab-35* delays PtdIns(3)P production,  
352 we characterized the localization of PtdIns(3)P kinases and phosphatases using time-lapse  
353 recording of phagosomes containing C1, C2, and C3. Although both PIKI-1 and VPS-34  
354 function as PI3-kinases during phagosome maturation, only PIKI-1 is observed when the  
355 nascent phagosome seals and initiates the PtdIns(4,5)P<sub>2</sub> to PtdIns(3)P shift, while VPS-34  
356 functions later on in maturation (16). Therefore, we monitored the phagosomal dynamics  
357 of PIKI-1, as well as MTM-1, the PI3-phosphatase it largely antagonizes (16,25). *rab-*  
358 *35(b1013)* mutants exhibited normal recruitment of PIKI-1::GFP; the enrichment of  
359 PIKI-1::GFP was observed on the surface of every phagosome, and the level of  
360 enrichment was comparable to that observed in wild-type embryos (Fig S4). In contrast,  
361 MTM-1::GFP persists on the surface of phagosomes approximately twice as long in *rab-*  
362 *35(b1013)* mutants – and more than thrice as long in *ced-1(n1056)* mutants – compared to  
363 wild-type embryos (Fig 6A). These results indicate that both RAB-35 and CED-1 are  
364 required for the timely removal of MTM-1 from phagosomal surfaces. Furthermore, *rab-*  
365 *35(b1013); ced-1(n1506)* double mutants display an even longer delay in MTM-1::GFP

366 removal, indicating that *rab-35* and *ced-1* function partially redundantly to regulate  
367 MTM-1 removal (Fig 6C). The timing of PtdIns(4,5)P<sub>2</sub> disappearance and MTM-1  
368 removal from phagosomal surfaces are similar in all backgrounds analyzed (Fig 4D+6C),  
369 consistent with the fact that MTM-1 is a PtdIns(4,5)P<sub>2</sub> effector (25). In addition, it  
370 suggests that, in *rab-35* mutants, the persistent presence of PtdIns(4,5)P<sub>2</sub> on phagosomal  
371 surfaces causes MTM-1 to remain on phagosomes as well.

372

373 RAB-35 promotes the recruitment of SNX-1, a PtdIns(3)P effector, to phagosomal  
374 surfaces

375         Sorting nexins SNX-1 and LST-4, two PtdIns(3)P effectors and membrane  
376 remodeling factors, are recruited to phagosomal surfaces by PtdIns(3)P (46). SNX-  
377 1::GFP and LST-4::GFP were visualized using time lapse microscopy to characterize  
378 their localization to phagosomal surfaces. SNX-1::GFP is found on 100% of phagosomes  
379 in wild-type embryos; moreover, it forms a continuous ring on the surface in >90% of  
380 phagosomes, a pattern suggesting the presence of a large enough number of the SNX-  
381 1::GFP molecules to cover the entire surface of a phagosome (Figure 6B+D(a)). In  
382 contrast, only 73.3% of phagosomes *rab-35(b1013)* mutants recruit SNX-1::GFP; of  
383 these phagosomes, more than half recruit SNX-1::GFP as isolated puncta instead of as a  
384 continuous ring (Fig 6B+D(a)). These results suggest that RAB-35 is important for the  
385 efficient recruitment of SNX-1::GFP to phagosomes, consistent with the defects in  
386 PtdIns(3)P production previously observed in *rab-35* mutants. However, continuous  
387 rings of LST-4::GFP were observed on 100% of phagosomes in both *rab-35(b1013)*  
388 mutants and wild-type embryos (Fig 6D(b)). Given that our lab has previously shown

389 that the recruitment of LST-4 is mediated in part through DYN-1 (46), this suggests that  
390 RAB-35 may also recruit SNX-1 through a more direct mechanism rather than just  
391 indirectly through PtdIns(3)P production.

392

393 *rab-35* recruits RAB-5 to phagosomes and acts in the same genetic pathway as *rab-5*  
394 during phagosomal maturation

395         Given that *rab-35(b1013)* mutants are defective in production of PtdIns(3)P, and  
396 that the recruitment of RAB-5 and the production of PtdIns(3)P on phagosomal surfaces  
397 are co-dependent processes (16), we investigated the functional relationship between  
398 RAB-35 and RAB-5. We made a number of observations that indicate that RAB-35  
399 functions upstream of RAB-5 in the regulation of phagosome maturation. Firstly, the  
400 enrichment of mRFP::RAB-35 on the surface of nascent phagosomes precedes that of  
401 GFP::RAB-5 by approximately 30-60 seconds (Fig 7A). Secondly, inactivation of *rab-5*  
402 using RNAi treatment in wild-type embryos results in the presence of extra cell corpses;  
403 moreover, the *rab-35* null mutation does not further enhance the Ced phenotype caused  
404 by *rab-5*(RNAi) treatment (Fig 7C), suggesting *rab-35* and *rab-5* act in the same genetic  
405 pathway. Thirdly, *rab-35(b1013)* mutants exhibit a delay in the recruitment of RAB-5 to  
406 the phagosome (Fig 7B+D). This delay resembles that caused by the *ced-1* mutation  
407 (Fig 7B+D), although it is not as severe. Additionally, *rab-35(b1013); ced-1(n1506)*  
408 double mutants display a stronger delay than either single mutant (Fig 7B+D), suggesting  
409 that *rab-35* and *ced-1* function in parallel to recruit RAB-5 to the phagosome.

410

411 During cell corpse internalization, RAB-35 plays a specific role in the recognition of cell  
412 corpses

413         The initial enrichment of GFP::RAB-35 on extending pseudopods (Fig 2B)  
414 suggests that in addition to phagosome maturation, RAB-35 might function in other steps  
415 of cell-corpse clearance. To determine whether RAB-35 plays any role in the recognition  
416 and/or the engulfment of cell corpses, we took advantage of CED-1 $\Delta$ C::GFP, a GFP  
417 tagged and truncated form of CED-1 that is missing its C-terminal intracellular domain  
418 (26). This reporter, when expressed in *ced-1(+)* strains, first clusters to the contact site  
419 between the engulfing and dying cell, subsequently spreads to the extending pseudopods,  
420 and, when engulfment is complete, finally forms a ring around the nascent phagosome  
421 (28). Unlike native CED-1, CED-1 $\Delta$ C::GFP stays on the surface of a phagosome until it  
422 is completely degraded (28). Thus, cell corpses labeled with complete CED-1 $\Delta$ C::GFP  
423 rings must have been previously engulfed, while cell corpses in the middle of being  
424 engulfed are labeled with partial GFP<sup>+</sup> rings that represent phagocytic cups. Cell corpses  
425 that are not recognized by an engulfing cell fail to be labeled by a GFP signal (Fig 8A).

426         We first analyzed all cell corpses in mid-stage (1.5-fold stage) embryos. In *rab-*  
427 *35(b1013)* embryos, a significantly lower percentage of engulfed cell corpses were  
428 observed compared to wild-type embryos (Fig 8B), suggesting that the *rab-35* mutation  
429 causes defects in the internalization of cell corpses. Such a failure in cell corpse  
430 internalization may result from defects in the recognition or the actual engulfment of the  
431 cell corpse. To distinguish which of these is the case, we monitored the generation and  
432 extension of pseudopods around dying cells C1, C2, and C3 using the CED-1 $\Delta$ C::GFP  
433 reporter. In this assay, a delay in the clustering of GFP signal on the site of contact

434 between a cell corpse and its engulfing cell indicates a delay in the recognition of the cell  
435 corpse. To further discern the precise moment that pseudopod extension initiates, we  
436 took advantage of the temporal consistency of *C. elegans* development between embryos,  
437 marking the moment when the two ventral hypodermal cells ABplaapppp and  
438 ABpraapppp begin to extend towards the ventral midline as the “0” time point (Fig 8C).  
439 Because  $P_{ced-1} \text{ ced-1}\Delta C::gfp$  is expressed in embryonic hypodermal cells and localizes to  
440 the plasma membrane, the GFP signal allows us to accurately record this moment (Fig  
441 8D).

442 We observed that the recognition of cell corpses was delayed in *rab-35(b1013)*  
443 mutant embryos (Fig S5). In wild-type embryos, 40% of the cell corpses are recognized  
444 within the first 10 minutes of ventral enclosure, yet in *rab-35(b1013)* mutants, only 6.7%  
445 cell corpses are recognized within that same time period (Fig S5A(a)). Additionally, in  
446 *rab-35(b1013)* mutants, 20% of the cell corpses are recognized between 21-30 minutes  
447 after the start of ventral enclosure, whereas only 6.7% of cell corpses take that long to be  
448 recognized in wild-type embryos (Fig S5A(a)). Conversely, *rab-35* loss of function  
449 causes no observable delays in pseudopod extension or phagosome sealing once the cell  
450 corpse is recognized (Fig S5B). Together, these results indicate that during the cell-  
451 corpse internalization process, RAB-35 specifically regulates the recognition of cell  
452 corpses.

453

454 RAB-35 acts in a pathway separate from the CED-1 or CED-5 pathways to promote the  
455 recognition of cell corpses



456 We found that null mutants of *ced-1* and *ced-5*, two engulfment genes that each  
457 represents one of the two parallel pathways for engulfment (8,47,48), display  
458 significantly greater delays in cell corpse recognition relative to *rab-35(b1013)* null  
459 mutants (S5A(a-c)), indicating that both CED-1 and CED-5 are essential for the timely  
460 recognition of apoptotic cells. The *ced-1; ced-5* double null mutant embryos suffer  
461 greater recognition delay than each single mutant strain (Fig S5A(b-d)), supporting this  
462 conclusion. We further observed that in double mutant combinations, *rab-35(b1013)*  
463 mutants enhanced the recognition delay of both *ced-1(n1506)* and *ced-5(n1812)* mutants  
464 (Fig S5A(b-c)), suggesting that *rab-35* acts in a previously unknown pathway separate  
465 from the *ced-1* or *ced-5* pathways in the context of cell corpse recognition. The *ced-1;*  
466 *rab-35; ced-5* triple null mutants suffer from a stronger recognition delay than any of the  
467 respective double mutants, with 63.2% of cell corpses being recognized more than 40  
468 minutes after ventral enclosure started (Fig S5A(d)), further supporting our hypothesis.

469

470 RAB-35 represents a third genetic pathway that facilitates the clearance of cell corpses in  
471 parallel to the CED-1/6/7 and CED-2/5/10/12 pathways

472 We have identified the functions of RAB-35 in two distinct cell-corpse clearance  
473 events: (I) the recognition and (II) the degradation of cell corpses. In both of these  
474 events, RAB-35 appears to function independently of both CED-1 and CED-5. To  
475 further determine whether *rab-35* represents a third pathway in addition to the *ced-1* and  
476 *ced-5* pathways to regulate apoptotic cell clearance, we performed a thorough epistasis  
477 analysis between *rab-35* and the two canonical pathways, the *ced-1/ced-6/ced-7* pathway  
478 and the *ced-2/ced-5/ced-10/ced-12* pathway (48). This epistasis analysis was performed

479 by quantifying the number of cell corpses in double mutant combinations between the  
480 null allele *rab-35(b1013)* and null alleles of representative genes in each of the two  
481 canonical engulfment pathways. Remarkably, *rab-35* was found to be parallel to multiple  
482 components of both the *ced-1/ced-6/ced-7* pathway (*ced-1* and *ced-6*) and the *ced-2/ced-*  
483 *5/ced-10/ced-12* pathway (*ced-5*, *ced-10*, and *ced-12*); *rab-35* loss of function  
484 tremendously enhances the Ced phenotype of each of these mutants in 1.5-fold embryos,  
485 4-fold embryos, and the 48-hour post-L4 adult gonad (Fig 9A-B). In *rab-35(b1013);*  
486 *ced-1(n1506); ced-5(n1812)* triple mutants, 4-fold embryos contain nearly as many  
487 apoptotic cell corpses as 1.5-fold embryos, suggesting that cell corpses produced  
488 throughout embryogenesis persist until hatching; this behavior is indicative of a near  
489 complete block of apoptotic cell clearance (Fig 9A-B).

490

## 491 **Discussion:**

492 The study of apoptotic cell clearance is still relatively nascent, and a number of  
493 important components – such as *C. elegans* RAB-35 – are in the process of being  
494 discovered. Rab35 is a multifunctional GTPase that plays important roles in a wide  
495 variety of biological processes. Mammalian Rab35 has been implicated in events  
496 including, but not limited to: exocytosis (49,50), endocytic recycling (51–54), cytokinesis  
497 (55,56), cytoskeleton rearrangement (56–61), and autophagy (62). Recently, Rab35 was  
498 found to be an oncogene that promotes proliferation by activating the PI3K/AKT  
499 signaling pathway (63). Like its mammalian homolog, *C. elegans* RAB-35/RME-5, as

500 well as its GEF RME-4, were found to act in endocytic recycling and yolk uptake in the  
501 developing oocytes (41).

502 Mammalian and *Drosophila* Rab35 have been implicated in phagocytosis and  
503 phagosome maturation, two processes that are closely linked with apoptotic cell  
504 clearance. Inactivating Rab35 reduces the internalization efficiency of macrophages  
505 against erythrocytes, zymosan particles, and microbes (57,64–66). In addition,  
506 overexpression of dominant negative Rab35(S22N) inhibits the maturation of  
507 phagosomes carrying pathogenic bacteria (67). However, besides finding that Rab35  
508 facilitates phagocytic cup formation through the ARF6 GTPase, which in turn regulates  
509 the actin cytoskeleton (64,65), not much else is known about the molecular mechanisms  
510 employed by Rab35 to support phagosome formation and maturation. In addition,  
511 whether Rab35 plays any role in the clearance of apoptotic cells was not known.

512 Our work in *C. elegans* has discovered that RAB-35 regulates multiple cell corpse  
513 clearance events (Fig 9C). We have uncovered a novel role in the recognition of cell  
514 corpses by RAB-35, a process that enables engulfment and the formation of a nascent  
515 phagosome. RAB-35 then helps to initiate the maturation of this nascent phagosome  
516 through novel molecular mechanisms that promote the PtdIns(4,5)P<sub>2</sub> to PtdIns(3)P switch  
517 on phagosomes and aid in the recruitment of RAB-5 to the phagosomal surface.  
518 Furthermore, RAB-35 leads a genetic pathway in parallel to the two known pathways for  
519 apoptotic cell clearance, establishing mechanisms that promote robustness and ensure  
520 efficiency throughout clearance.

521

522 RAB-35 function depends on its cycling between GDP- and GTP-bound forms, a process  
523 facilitated by the GAP TBC-10 and the GEFs FLCN-1 and RME-4

524 For many Rab small GTPases, such as Rab7, the GTP- and GDP-bound forms are  
525 their active and inactive forms, respectively (18,68,69). Other small GTPases, such as  
526 RAB-5, need to cycle between the GTP- and GDP-bound forms in order to function (70).  
527 Our characterization of the presumed GTP- and GDP-locked mutant forms of RAB-35  
528 has revealed that the specific function of RAB-35 in apoptotic cell clearance depends on  
529 the cycling between its GTP- and GDP-bound forms, resembling the dynamics observed  
530 in RAB-5.

531 Among three *C. elegans* homologs of mammalian proteins known to act as Rab35  
532 GAPs (71), we have identified TBC-10 as the GAP for RAB-35 in the context of  
533 apoptotic cell clearance. In *tbc-10* deletion mutants, where RAB-35 supposedly is locked  
534 in the GTP-bound state, GFP::RAB-35 persists on the surfaces of phagosomes, yet  
535 apoptotic cell clearance is defective in a manner akin to *rab-35* null mutants. These  
536 observations support the hypothesis that RAB-35 must cycle between its GTP- and GDP-  
537 bound forms to properly function, although the reasons behind this phenomena are yet  
538 unclear.

539 Although the *in vitro* GEF activity of folliculin towards mammalian Rab35 has  
540 been detected (72), and folliculin was reported to activate Rab35 in order to mediate EGF  
541 receptor recycling in a cancer cell line (73), the functional relationship between folliculin  
542 and Rab35 under physiological conditions in an animal context has not been reported.  
543 We found that *flcn-1*, the *C. elegans* homolog of folliculin, acts in the same genetic  
544 pathway as *rab-35* does to promote cell-corpse clearance, suggesting that FLCN-1 is a

545 putative GEF for RAB-35 during cell-corpse clearance. This is the first time that  
546 folliculin has been implicated as a GEF for RAB-35 during animal development.

547 While *flcn-1* and *rab-35* act in the same genetic pathway, the Ced phenotype  
548 displayed by the *flcn-1* null mutants is slightly weaker than that of the *rab-35* null  
549 mutants. We observed that *C. elegans* RME-4, a homolog of the connectens  
550 DENND1A-C and a GEF for RAB-35 in yolk receptor recycling (41), activates RAB-35  
551 alongside FLCN-1 during apoptotic cell clearance. However, the *rme-4* null mutation  
552 does not cause a significant defect in clearance by itself, suggesting that FLCN-1 acts as  
553 the predominant GEF for RAB-35 in the context of apoptotic cell clearance, while RME-  
554 4 only plays a minor role. Our results are consistent with the observation that, as a  
555 multifunctional GTPase, RAB-35 is regulated by different GEFs in each cellular event  
556 that it is involved (44).

557

558 RAB-35 modulates the initiation of phagosome maturation by regulating  
559 phosphatidylinositol dynamics and RAB-5 recruitment

560 Phosphorylated forms of phosphatidylinositol species are second messengers that  
561 play essential roles leading the formation and degradation of phagosomes (24). During  
562 apoptotic cell clearance in *C. elegans*, a process known as the PtdIns(4,5)P<sub>2</sub> to PtdIns(3)P  
563 switch occurs immediately after the sealing of pseudopods and the formation of nascent  
564 phagosomes. During this shift, PtdIns(4,5)P<sub>2</sub> – which had been enriched on extending  
565 pseudopods – rapidly disappears from phagosomal surfaces, while PtdIns(3)P – essential

566 for the initiation of phagosome maturation – subsequently appears on phagosomal  
567 surfaces at a high level and oscillates in a biphasic pattern (16,25).

568 We have observed that once engulfment starts, GFP::RAB-35 becomes enriched  
569 on the surface of extending pseudopods. The pseudopod localization pattern overlaps  
570 with that of PtdIns(4,5)P<sub>2</sub> and can be explained by its membrane-anchoring prenylation  
571 motif typical of Rab GTPases (74) as well as by an evolutionarily conserved polybasic  
572 region that has a high affinity for negatively charged phosphatidylinositol species such as  
573 PtdIns(4,5)P<sub>2</sub> (75–77). Immediately after engulfment, RAB-35 is further transiently  
574 enriched on the surface of the nascent phagosome. On nascent phagosomes, the initiation  
575 of this RAB-35 enrichment coincides perfectly with both the turnover of PtdIns(4,5)P<sub>2</sub>  
576 and the appearance of PtdIns(3)P. This unique pattern is consistent with a role of RAB-  
577 35 in the switch of phagosomal phosphatidylinositol species from PtdIns(4,5)P<sub>2</sub> to  
578 PtdIns(3)P.

579 Furthermore, we found that *rab-35* mutants suffer significant delays in both the  
580 disappearance of PtdIns(4,5)P<sub>2</sub> and the appearance of the first wave of PtdIns(3)P on  
581 phagosomal membranes. Interestingly, we found no defects in the recruitment of the PI3-  
582 kinase PIKI-1. However, we discovered that the PI3-phosphatase MTM-1, a  
583 PtdIns(4,5)P<sub>2</sub> effector that dephosphorylates PtdIns(3)P and in this way counteracts the  
584 function of PI3-kinases, persists on the surface of nascent phagosomes much longer in  
585 *rab-35* mutants. Together, the above evidence indicates that RAB-35 promotes the  
586 turnover of PtdIns(4,5)P<sub>2</sub> on phagosomal membranes, which in turn removes MTM-1 and  
587 consequently suppresses PI3-phosphatase activity. We have also found that RAB-35  
588 contributes to RAB-5 recruitment on phagosomal surfaces. As RAB-5 promotes the

589 production of PtdIns(3)P on phagosomal surfaces (16), we propose that RAB-35  
590 facilitates the robust production of PtdIns(3)P on phagosomal surfaces through two  
591 separate activities, the removal of PtdIns(4,5)P<sub>2</sub> and the recruitment of RAB-5 (Fig 9C).

592 This delay of the robust production of PtdIns(3)P observed in *rab-35* mutants is  
593 associated with numerous defects in phagosome maturation: (I) The degradation of cell  
594 corpses as a whole is delayed; (II) The recruitment of early endosomes, an intracellular  
595 organelle that is incorporated into phagosomes and is essential for phagosome maturation  
596 (13), is also delayed; and (III) SNX-1, a sorting nexin and a PtdIns(3)P effector known to  
597 promote phagosome maturation (46), is recruited to the phagosomal surface less  
598 efficiently. Considering that SNX-1 is necessary for the recruitment of early endosomes  
599 to phagosomes (46), we propose that this defect in SNX-1 recruitment observed in *rab-35*  
600 mutants causes a defect in the recruitment of early endosomes. Our findings thus  
601 uncover a novel molecular mechanism employed by RAB-35 for cell-corpse degradation  
602 and delineates a novel pathway led by RAB-35 that is responsible for regulating the  
603 PtdIns(4,5)P<sub>2</sub> to PtdIns(3)P switch, an event essential for the initiation of phagosome  
604 maturation.

605 What we report suggests that RAB-35 promotes phagosome maturation primarily  
606 through the removal of PtdIns(4,5)P<sub>2</sub> on phagosomal surfaces. In addition, inactivation of  
607 mammalian Rab35 results in the accumulation of PtdIns(4,5)P<sub>2</sub> on intracellular vacuoles  
608 and other structures (55,58), suggesting that the timely turnover of PtdIns(4,5)P<sub>2</sub> is a  
609 conserved activity of Rab35. How, then, does the localization and activation of RAB-35  
610 on the surface of a nascent phagosome cause the disappearance of PtdIns(4,5)P<sub>2</sub>? The  
611 level of PtdIns(4,5)P<sub>2</sub> is known to be determined by two antagonizing activities, the

612 phosphorylation of PtdIns(4)P or PI(5)P by PtdIns kinases and the dephosphorylation of  
613 PtdIns(4,5)P<sub>2</sub> by PtdIns phosphatases (78). OCRL, a 5-phosphatase that  
614 dephosphorylates PtdIns(4,5)P<sub>2</sub>, physically interacts with the GTP-bound form of Rab35  
615 and was reported to function as a Rab35 effector that regulates PtdIns(4,5)P<sub>2</sub> turnover  
616 during cytokinesis (58). OCRL-1, its *C. elegans* homolog, was reported to play an active  
617 role in modulating PtdIns(4,5)P<sub>2</sub> turnover on the surfaces of pseudopods and  
618 phagosomes, and its inactivation results in a strong Ced phenotype indicative of a cell  
619 corpse clearance defect (25). Thus, we propose that OCRL-1 is a promising candidate  
620 linking RAB-35 with PtdIns(4,5)P<sub>2</sub> levels on the phagosomal surface; however, whether  
621 RAB-35 regulates the activity and/or subcellular localization of OCRL-1 has yet to be  
622 investigated.

623

624 RAB-35 acts as a robustness factor and defines a novel third cell corpse-clearance  
625 pathway

626 The phagocytic receptor CED-1 and its adaptor CED-6 lead a phagosome  
627 maturation pathway in addition to their known role in the recognition of cell corpses (13).  
628 This pathway promotes PtdIns(3)P production on – and Rab GTPase recruitment to –  
629 phagosomal surfaces (13). We observed that all of the defects in phagosome maturation  
630 displayed by *rab-35* null mutants, including the persistence of PtdIns(4,5)P<sub>2</sub> and its  
631 effector MTM-1 on nascent phagosomes, the delay in phagosomal PtdIns(3)P production,  
632 the various defects in the recruitment of SNX-1 and RAB-5, and the delay of the  
633 incorporation of early endosomes to phagosomes, are also displayed by *ced-1* null  
634 mutants (8,20,46) (Figs 4-6). However, all of these defects are much more severe in *ced-*



635 *l* mutants; for instance, phagosomal PtdIns(3)P production, the incorporation of early  
636 phagosomes, and phagosome degradation are frequently blocked (8,18), whereas in *rab-*  
637 *35* mutants they are merely delayed. To determine whether RAB-35 functions as a  
638 component of the CED-1 pathway during phagosome maturation, we analyzed *rab-35;*  
639 *ced-1* double mutants. To our surprise, the double mutants display enhanced defects  
640 relative to their single mutants in all of the assays mentioned above, indicating that RAB-  
641 35 initiates phagosome maturation in a manner independent of the CED-1 pathway.  
642 Given that CED-1 controls other events such as the incorporation of lysosomes to  
643 phagosomes in addition to those events regulated by RAB-35 (18), our observations  
644 suggest that this novel RAB-35 pathway acts redundantly to the CED-1 pathway in some,  
645 but not necessarily all, functions of phagosome maturation.

646 Two parallel pathways, the *ced-1/-6/-7* and *ced-2/-5/-10/-12* pathways, are known  
647 to control the recognition and engulfment of cell corpses (18,48,79). The *rab-35(b1013)*  
648 null mutation also causes a delay during this process, but this defect is not as severe as  
649 that observed with either the *ced-1* or *ced-5* null mutations. While *rab-35* mutants  
650 exhibit no defects in either pseudopod extension or phagosome sealing, *rab-35* loss of  
651 function enhances the defect in cell corpse recognition observed in *ced-1* mutants,  
652 suggesting that RAB-35 and CED-1 function in parallel on engulfing cells to recognize  
653 apoptotic cells. Furthermore, when we perform epistasis analysis to measure the overall  
654 clearance defect by counting the number of persistent cell corpses in double and triple  
655 mutant embryos, we found that *rab-35* defines a novel third pathway by acting in parallel  
656 to both the *ced-1/-6/-7* and *ced-2/-5/-10/-12* pathways. Currently, the identity of the  
657 phagocytic receptor(s) acting in this third pathway remains unknown, although we

658 strongly suspect transmembrane receptors known as integrins because they have been  
659 previously implicated in apoptotic cell clearance in both mammals and *C. elegans*  
660 (37,38,80,81). Further investigation is needed to determine whether any integrins act in  
661 the *rab-35* pathway.

662         Given that all phenotypes observed in *rab-35* single mutants are relatively  
663 modest, what is the purpose of this novel *rab-35* pathway during apoptotic cell clearance?  
664 We propose that RAB-35 acts as a robustness factor that provides a “buffer” to maintain  
665 the stability and effectiveness of cell corpse clearance. Robustness factors are important  
666 in maintaining system stability when animals encounter genetic or environmental  
667 changes. Indeed, after *rab-35* mutant embryos are subject to heat treatment, the Ced  
668 phenotype is further enhanced (Fig S6), indicating that RAB-35 helps to keep the  
669 mechanisms behind apoptotic cell clearance stable when the system is stressed. When  
670 both the CED-1 and CED-5 pathways are intact, missing RAB-35 activity only causes  
671 modest defects, much weaker than missing either of the two canonical pathways;  
672 however, when one or both of the two canonical pathways is inactivated or when under  
673 stress, the RAB-35 pathway provides the necessary activity to support cell corpse  
674 clearance activity. Considering that diseases can be thought of a subversion of the  
675 “robust yet fragile” nature of optimized and complex biological systems (82–84), we  
676 postulate that RAB-35 plays a critical role in health. This effect is likely enhanced in  
677 aging individuals that experience an increased incidence of autoimmunity and cancer  
678 (85,86), which are associated with defects in apoptotic cell clearance and RAB-35  
679 function (3,63,71,87). Further exploring this physiological role for RAB-35 will help  
680 broaden our view of the function of Rab GTPases in both development and diseases.

681

## 682 **Materials and Methods:**

### 683 **Mutations, strains, and transgenic arrays**

684 *C. elegans* strains were grown at 20°C as previously described (88). The N2  
685 Bristol strain was used as the reference wild-type strain. Mutations and integrated arrays  
686 are described by Riddle et al. (1997) and the Worm Base (<http://www.wormbase.org>),  
687 except when noted otherwise: LGI, *ced-1(n1506)*, *ced-12(n3261)*, *rab-2/unc-108(n3263)*,  
688 *rab-10(ok1494)*, *unc-75(e950)*; LGII, *flcn-1(ok975)*, *rab-7(ok511)*; LGIII, *ced-6(n2095)*,  
689 *rab-35(b1013, tm2058)*, *tbc-10(tm2790)*; LGIV, *ced-5(n1812)*, *ced-10(n1993)*; LGV,  
690 *unc-76(e911)*; LGX, *rme-4(ns410)*, *tbc-13(ok1812)*. All *ok* alleles were generated by the  
691 *C. elegans* Gene Knockout Consortium and distributed by *Caenorhabditis* Genetics  
692 Center (CGC). All *tm* alleles were generated and provided by the National Bioresource  
693 Project of Japan. Transgenic lines were generated by microinjection as previously  
694 described (89). Plasmids were injected alongside the coinjection marker pUNC76 [*unc-*  
695 *76(+)*] into *unc-76(e911)* mutant adult hermaphrodites as previously described (90), with  
696 non-Unc animals being identified as transgenic animals.

697

### 698 **Plasmid construction**

699 The cDNAs for *rab-11.1*, *-18*, *-19*, *-30*, *-33*, *-35*, *glo-1*, and *nuc-1* were amplified  
700 from a mixed-stage *C. elegans* cDNA library (Z. Zhou and H.R. Horvitz, unpublished  
701 data) using polymerase chain reaction (PCR). The cDNAs for *rab-11.1*, *-18*, *-19*, *-30*, *-*  
702 *33*, *-35*, *glo-1* were cloned into RNAi-by-feeding vector L4440 to generate RNAi

703 constructs.  $P_{ced-1} \text{gfp}::\text{rab-35}$  was constructed by cloning the *rab-35* cDNAs into the  
704 XmaI and KpnI sites of pZZ956 ( $P_{ced-1} \text{gfp}$ ).  $P_{ced-1} \text{mrfp}::\text{rab-35}$  was constructed by  
705 replacing the *gfp* cDNA in  $P_{ced-1} \text{gfp}::\text{rab-35}$  with *mrfp* cDNA. The (S24N) and (Q69L)  
706 mutations were introduced into  $P_{ced-1} \text{gfp}::\text{rab-35}$  using the QuickChange Site-directed  
707 Mutagenesis Kit (Stratagene, La Jolla, CA) to generate  $P_{ced-1} \text{gfp}::\text{rab-35}(S24N)$  and  $P_{ced-1}$   
708  $\text{gfp}::\text{rab-35}(Q69L)$ , respectively. Using the same kit, the S33N mutation was  
709 introduced into  $P_{hsp-16/2} \text{rab-5}$  and  $P_{hsp-16/41} \text{rab-5}$ .  $P_{hsp-16/2} \text{gfp}::\text{rab-5}(S33N)$  and  $P_{hsp-16/41}$   
710  $\text{gfp}::\text{rab-5}(S33N)$  were produced by inserting the *gfp* cDNA into  $P_{hsp-16/2} \text{rab-5}(S33N)$   
711 and  $P_{hsp-16/41} \text{rab-5}(S33N)$ , respectively. The *nuc-1* cDNA was inserted into the BamHI  
712 and XmaI sites of pZZ829 ( $P_{ced-1} \text{gfp}$ ) to generate  $P_{ced-1} \text{nuc-1}::\text{gfp}$ .  $P_{ced-1} \text{nuc-1}::\text{gfp}$  was  
713 generated by replacing the *gfp* cDNA with the *mrfp* cDNA. All plasmids contain an *unc-*  
714 *54* 3' UTR.

715

## 716 RNA interference (RNAi)

717 RNAi screen of the candidate *rab* genes was performed using the feeding protocol  
718 as previously described (91). The RNAi feeding constructs for *rab-11.1*, *-18*, *-19*, *-30*, *-*  
719 *33*, *-35*, and *glo-1* were produced by our lab, while the remaining constructs came from a  
720 *C. elegans* RNAi library (92,93). Mid-L4 stage hermaphrodites were placed on plates  
721 seeded with *E. coli* containing the RNAi feeding construct. After 48 hrs, the numbers of  
722 germ cell corpses per gonad arm were scored using a DIC microscope.

723 RNAi of *rab-5*, *ina-1*, *pat-2* was performed using the same feeding protocol as  
724 above using constructs from the same library except that, 24 hrs after L4-stage

725 hermaphrodites were placed on RNAi feeding plates, these adults were transferred to a  
726 second RNAi plate. After an additional 24 hours, the numbers of cell corpses in 1.5-fold  
727 and late 4-fold stage embryos were scored using a DIC microscope.

728

### 729 **Nomarski DIC microscopy**

730 DIC microscopy was performed using an Axionplan 2 compound microscope  
731 (Carl Zeiss, Thornwood, NY) equipped with Nomarski DIC optics, a digital camera  
732 (AxioCam MRm; Carl Zeiss), and imaging software (AxioVision; Carl Zeiss).  
733 Previously established protocols were used to score cell corpses under DIC microscopy  
734 (8,43). Somatic embryonic cell corpses were scored in the head region of embryos at  
735 various developmental stages (comma, 1.5-fold, 2-fold, late 4-fold, and early L1). Germ  
736 cell corpses were scored in one of the two gonadal arms of adult hermaphrodites 24 or 48  
737 hrs after the mid-L4 stage. Yolk analysis was performed by characterizing the amount of  
738 yolk found in the pseudocoelom near the gonads of adult hermaphrodites 24 or 48 hrs  
739 after the L4 stage.

740

### 741 **Fluorescence microscopy and quantification of cell corpse clearance events**

742 An Olympus IX70-Applied Precision DeltaVision microscope equipped with a  
743 DIC imaging apparatus and a Photometris Coolsnap 2 digital camera was used to capture  
744 fluorescence and DIC images, while Applied Precision SoftWoRxV software was utilized  
745 for image deconvolution and processing (43). To quantify the number of engulfed cell  
746 corpses in 1.5-fold to 2-fold stage embryos expressing CED-1 $\Delta$ C::GFP, both DIC and

747 GFP images of 40 serial z-sections at a 0.5- $\mu$ m were recorded for each embryo. Engulfed  
748 cell corpses were those labeled with a full GFP<sup>+</sup> circle. Unengulfed cell corpses were  
749 those that display the refractive appearance under DIC optics yet were either labeled with  
750 a partial GFP<sup>+</sup> circle or not labeled at all.

751 The dynamics of various GFP, mRFP, and mCherry reporters during the  
752 engulfment and degradation of cell corpses C1, C2, and C3 were examined using an  
753 established time-lapse recording protocol (18,43). Ventral surfaces of embryos were  
754 initially monitored 300-320 minutes post-first cleavage. Recordings typically lasted 60-  
755 180 minutes, with an interval of 30 secs to 2 mins. At each time point, 10-16 serial z-  
756 sections at a 0.5- $\mu$ m interval were recorded. Signs such as embryo elongation and  
757 embryo turning prior to comma stage were closely monitored under DIC to ensure that  
758 the embryo being recorded was developing normally. The moment of cell corpse  
759 recognition is the time when CED-1 $\Delta$ C::GFP first clusters to the region where an  
760 engulfing cell contacts a cell corpse, measured relative to the moment ventral enclosure  
761 begins; the initiation of ventral enclosure is defined as the time point when hypodermal  
762 cells ABplaapppp and ABpraapppp begin to extend across the ventral surface. The time  
763 period of pseudopod extension is the time interval between when budding pseudopods  
764 labeled with CED-1 $\Delta$ C::GFP are first observed and when the two pseudopods join and  
765 seal to form a nascent phagosome. The life span of a phagosome is defined as the time  
766 interval between when pseudopods seal to form the nascent phagosome and when the  
767 phagosome shrinks to one-third of its original radius.

768

769 **Acknowledgements:**

770 We thank K. Venken for reagents for Gibson cloning. We thank D. Reiner, S.  
771 Sazer, K. Venken, M. Wang, and T. Wensel for advice and helpful comments. We thank  
772 the Caenorhabditis Genetics Center (CGC) and the National BioResource Project in  
773 Japan (Shohei Mitani) for providing mutant strains.

774

### 775 **Author Contributions:**

776 The author(s) have made the following declarations about their contributions:  
777 Conceived and designed the experiments: RH ZZ. Performed the experiments: RH YW  
778 ZZ. Analyzed the data: RH YW ZZ. Wrote the paper: RH ZZ.

779

### 780 **References:**

- 781 1. Lockshin RA, Williams CM. Programmed cell death—II. Endocrine potentiation of the  
782 breakdown of the intersegmental muscles of silkworms. *J Insect Physiol.* 1964 Aug  
783 1;10(4):643–9.
- 784 2. Kerr JFR, Wyllie AH, Currie AR. Apoptosis: A Basic Biological Phenomenon with Wide-  
785 ranging Implications in Tissue Kinetics. *Br J Cancer.* 1972 Aug;26(4):239–57.
- 786 3. Elliott MR, Ravichandran KS. Clearance of apoptotic cells: implications in health and  
787 disease. *J Cell Biol.* 2010 Jun 28;189(7):1059–70.
- 788 4. Nagata S. Apoptosis and Clearance of Apoptotic Cells. *Annu Rev Immunol* [Internet]. 2018  
789 [cited 2018 Apr 3];36(1). Available from: [https://doi.org/10.1146/annurev-immunol-](https://doi.org/10.1146/annurev-immunol-042617-053010)  
790 [042617-053010](https://doi.org/10.1146/annurev-immunol-042617-053010)
- 791 5. Sulston JE, Schierenberg E, White JG, Thomson JN. The embryonic cell lineage of the  
792 nematode *Caenorhabditis elegans*. *Dev Biol.* 1983 Nov 1;100(1):64–119.
- 793 6. Sulston JE, Horvitz HR. Post-embryonic cell lineages of the nematode, *Caenorhabditis*  
794 *elegans*. *Dev Biol.* 1977 Mar 1;56(1):110–56.

- 795 7. Gumienny TL, Lambie E, Hartweg E, Horvitz HR, Hengartner MO. Genetic control of  
796 programmed cell death in the *Caenorhabditis elegans* hermaphrodite germline.  
797 *Development*. 1999 Mar 1;126(5):1011–22.
- 798 8. Yu X, Odera S, Chuang C-H, Lu N, Zhou Z. *C. elegans* Dynamin Mediates the Signaling of  
799 Phagocytic Receptor CED-1 for the Engulfment and Degradation of Apoptotic Cells. *Dev*  
800 *Cell*. 2006 Jun;10(6):743–57.
- 801 9. Zhou Z, Mangahas PM, Yu X. The Genetics of Hiding the Corpse: Engulfment and  
802 Degradation of Apoptotic Cells in *C. elegans* and *D. melanogaster*. In: *Current Topics in*  
803 *Developmental Biology* [Internet]. Academic Press; 2004 [cited 2017 Dec 1]. p. 91–143.  
804 Available from: <http://www.sciencedirect.com/science/article/pii/S0070215304630043>
- 805 10. Conradt B, Wu Y-C, Xue D. Programmed Cell Death During *Caenorhabditis elegans*  
806 *Development*. *Genetics*. 2016;203(4):1533–62.
- 807 11. Stenmark H, Olkkonen VM. The Rab GTPase family. *Genome Biol*.  
808 2001;2(5):reviews3007.1-reviews3007.7.
- 809 12. Sztamári Z, Sass M. The autophagic roles of Rab small GTPases and their upstream  
810 regulators: a review. *Autophagy*. 2014 Jul;10(7):1154–66.
- 811 13. Lu N, Zhou Z. Membrane Trafficking and Phagosome Maturation During the Clearance of  
812 Apoptotic Cells. *Int Rev Cell Mol Biol*. 2012;293:269–309.
- 813 14. Gutierrez MG. Functional role(s) of phagosomal Rab GTPases. *Small GTPases*. 2013  
814 Sep;4(3):148–58.
- 815 15. Kinchen JM, Doukometzidis K, Almendinger J, Stergiou L, Tosello-Trampont A, Sifri CD,  
816 et al. A pathway for phagosome maturation during engulfment of apoptotic cells. *Nat Cell*  
817 *Biol*. 2008 May;10(5):556.
- 818 16. Lu N, Shen Q, Mahoney TR, Neukomm LJ, Wang Y, Zhou Z. Two PI 3-kinases and one PI 3-  
819 phosphatase together establish the cyclic waves of phagosomal PtdIns(3)P critical for the  
820 degradation of apoptotic cells. *PLoS Biol*. 2012 Jan;10(1):e1001245.
- 821 17. Mallo GV, Espina M, Smith AC, Terebiznik MR, Alemán A, Finlay BB, et al. SopB promotes  
822 phosphatidylinositol 3-phosphate formation on *Salmonella* vacuoles by recruiting Rab5  
823 and Vps34. *J Cell Biol*. 2008 Aug 25;182(4):741–52.
- 824 18. Yu X, Lu N, Zhou Z. Phagocytic Receptor CED-1 Initiates a Signaling Pathway for Degrading  
825 Engulfed Apoptotic Cells. *PLoS Biol* [Internet]. 2008 Mar [cited 2017 Nov 22];6(3).  
826 Available from: <https://www.ncbi.nlm.nih.gov/pmc/articles/PMC2267821/>
- 827 19. Harrison RE, Bucci C, Vieira OV, Schroer TA, Grinstein S. Phagosomes Fuse with Late  
828 Endosomes and/or Lysosomes by Extension of Membrane Protrusions along  
829 Microtubules: Role of Rab7 and RILP. *Mol Cell Biol*. 2003 Sep 15;23(18):6494–506.



- 830 20. He B, Yu X, Margolis M, Liu X, Leng X, Etzion Y, et al. Live-Cell Imaging in *Caenorhabditis*  
831 *elegans* Reveals the Distinct Roles of Dynamin Self-Assembly and Guanosine  
832 Triphosphate Hydrolysis in the Removal of Apoptotic Cells. *Mol Biol Cell*. 2010 Feb  
833 15;21(4):610–29.
- 834 21. Lu Q, Zhang Y, Hu T, Guo P, Li W, Wang X. *C. elegans* Rab GTPase 2 is required for the  
835 degradation of apoptotic cells. *Development*. 2008 Mar 15;135(6):1069–80.
- 836 22. Mangahas PM, Yu X, Miller KG, Zhou Z. The small GTPase Rab2 functions in the removal  
837 of apoptotic cells in *Caenorhabditis elegans*. *J Cell Biol*. 2008 Jan 28;180(2):357–73.
- 838 23. Guo P, Hu T, Zhang J, Jiang S, Wang X. Sequential action of *Caenorhabditis elegans* Rab  
839 GTPases regulates phagolysosome formation during apoptotic cell degradation. *Proc Natl*  
840 *Acad Sci*. 2010 Oct 19;107(42):18016–21.
- 841 24. Levin R, Grinstein S, Canton J. The life cycle of phagosomes: formation, maturation, and  
842 resolution. *Immunol Rev*. 2016;273(1):156–79.
- 843 25. Cheng S, Wang K, Zou W, Miao R, Huang Y, Wang H, et al. PtdIns(4,5)P<sub>2</sub> and PtdIns3P  
844 coordinate to regulate phagosomal sealing for apoptotic cell clearance. *J Cell Biol*. 2015  
845 Aug 3;210(3):485–502.
- 846 26. Zhou Z, Hartweg E, Horvitz HR. CED-1 Is a Transmembrane Receptor that Mediates Cell  
847 Corpse Engulfment in *C. elegans*. *Cell*. 2001 Jan 12;104(1):43–56.
- 848 27. Venegas V, Zhou Z. Two Alternative Mechanisms That Regulate the Presentation of  
849 Apoptotic Cell Engulfment Signal in *Caenorhabditis elegans*. *Mol Biol Cell*. 2007  
850 Aug;18(8):3180–92.
- 851 28. Shen Q, He B, Lu N, Conradt B, Grant BD, Zhou Z. Phagocytic receptor signaling regulates  
852 clathrin and epsin-mediated cytoskeletal remodeling during apoptotic cell engulfment in  
853 *C. elegans*. *Development*. 2013 Aug 1;140(15):3230–43.
- 854 29. Liu QA, Hengartner MO. Candidate adaptor protein CED-6 promotes the engulfment of  
855 apoptotic cells in *C. elegans*. *Cell*. 1998 Jun 12;93(6):961–72.
- 856 30. Wu YC, Horvitz HR. The *C. elegans* cell corpse engulfment gene *ced-7* encodes a protein  
857 similar to ABC transporters. *Cell*. 1998 Jun 12;93(6):951–60.
- 858 31. Gumienny TL, Brugnera E, Tosello-Trampont A-C, Kinchen JM, Haney LB, Nishiwaki K, et  
859 al. CED-12/ELMO, a Novel Member of the CrkII/Dock180/Rac Pathway, Is Required for  
860 Phagocytosis and Cell Migration. *Cell*. 2001 Oct 5;107(1):27–41.
- 861 32. Kang Y, Xu J, Liu Y, Sun J, Sun D, Hu Y, et al. Crystal structure of the cell corpse engulfment  
862 protein CED-2 in *Caenorhabditis elegans*. *Biochem Biophys Res Commun*. 2011 Jul  
863 1;410(2):189–94.
- 864 33. Reddien PW, Horvitz HR. CED-2/CrkII and CED-10/Rac control phagocytosis and cell  
865 migration in *Caenorhabditis elegans*. *Nat Cell Biol*. 2000 Mar;2(3):131–6.

- 866 34. Chen W, Chen S, Yap SF, Lim L. The *Caenorhabditis elegans* p21-activated kinase (CePAK)  
867 colocalizes with CeRac1 and CDC42Ce at hypodermal cell boundaries during embryo  
868 elongation. *J Biol Chem*. 1996 Oct 18;271(42):26362–8.
- 869 35. Wu YC, Tsai MC, Cheng LC, Chou CJ, Weng NY. *C. elegans* CED-12 acts in the conserved  
870 crkl/DOCK180/Rac pathway to control cell migration and cell corpse engulfment. *Dev*  
871 *Cell*. 2001 Oct;1(4):491–502.
- 872 36. Mangahas PM, Zhou Z. Clearance of apoptotic cells in *Caenorhabditis elegans*. *Semin Cell*  
873 *Dev Biol*. 2005 Apr 1;16(2):295–306.
- 874 37. Hsu T-Y, Wu Y-C. Engulfment of Apoptotic Cells in *C. elegans* Is Mediated by Integrin  
875  $\alpha$ /SRC Signaling. *Curr Biol*. 2010 Mar 23;20(6):477–86.
- 876 38. Hsieh H-H, Hsu T-Y, Jiang H-S, Wu Y-C. Integrin  $\alpha$  PAT-2/CDC-42 Signaling Is Required for  
877 Muscle-Mediated Clearance of Apoptotic Cells in *Caenorhabditis elegans*. *PLOS Genet*.  
878 2012 May 17;8(5):e1002663.
- 879 39. WormBase<sup>®</sup>: Nematode Information Resource [Internet]. [cited 2017 Dec 6]. Available  
880 from: <http://www.wormbase.org/#012-34-5>
- 881 40. Gallegos ME, Balakrishnan S, Chandramouli P, Arora S, Azameera A, Babushekar A, et al.  
882 The *C. elegans* Rab Family: Identification, Classification and Toolkit Construction. *PLOS*  
883 *ONE*. 2012 Nov 21;7(11):e49387.
- 884 41. Sato M, Sato K, Liou W, Pant S, Harada A, Grant BD. Regulation of endocytic recycling by  
885 *C. elegans* Rab35 and its regulator RME-4, a coated-pit protein. *EMBO J*. 2008 Apr  
886 23;27(8):1183–96.
- 887 42. Rompay LV, Borghraef C, Beets I, Caers J, Temmerman L. New genetic regulators  
888 question relevance of abundant yolk protein production in *C. elegans*. *Sci Rep* [Internet].  
889 2015 Nov 10 [cited 2018 Mar 28];5. Available from:  
890 <https://www.ncbi.nlm.nih.gov/pmc/articles/PMC4639837/>
- 891 43. Lu N, Yu X, He X, Zhou Z. Detecting apoptotic cells and monitoring their clearance in the  
892 nematode *Caenorhabditis elegans*. *Methods Mol Biol Clifton NJ*. 2009;559:357–70.
- 893 44. Chaineau M, Ioannou MS, McPherson PS. Rab35: GEFs, GAPs and Effectors. *Traffic*. 2013  
894 Nov 1;14(11):1109–17.
- 895 45. Liu B, Du H, Rutkowski R, Gartner A, Wang X. LAAT-1 is the Lysosomal Lysine/Arginine  
896 Transporter that Maintains Amino Acid Homeostasis. *Science*. 2012 Jul  
897 20;337(6092):351–4.
- 898 46. Lu N, Shen Q, Mahoney TR, Liu X, Zhou Z. Three sorting nexins drive the degradation of  
899 apoptotic cells in response to PtdIns(3)P signaling. *Mol Biol Cell*. 2011 Feb 1;22(3):354–  
900 74.

- 901 47. Ellis HM, Horvitz HR. Genetic control of programmed cell death in the nematode *C.*  
902 *elegans*. *Cell*. 1986 Mar 28;44(6):817–29.
- 903 48. Reddien PW, Horvitz HR. The engulfment process of programmed cell death in  
904 *Caenorhabditis elegans*. *Annu Rev Cell Dev Biol*. 2004;20:193–221.
- 905 49. Hsu C, Morohashi Y, Yoshimura S, Manrique-Hoyos N, Jung S, Lauterbach MA, et al.  
906 Regulation of exosome secretion by Rab35 and its GTPase-activating proteins TBC1D10A–  
907 C. *J Cell Biol*. 2010 Apr 19;189(2):223–32.
- 908 50. Biesemann A, Gorontzi A, Barr F, Gerke V. Rab35 protein regulates evoked exocytosis of  
909 endothelial Weibel-Palade bodies. *J Biol Chem*. 2017 14;292(28):11631–40.
- 910 51. Patino-Lopez G, Dong X, Ben-Aissa K, Bernot KM, Itoh T, Fukuda M, et al. Rab35 and Its  
911 GAP EPI64C in T Cells Regulate Receptor Recycling and Immunological Synapse  
912 Formation. *J Biol Chem*. 2008 Jun 27;283(26):18323–30.
- 913 52. Walseng E, Bakke O, Roche PA. Major Histocompatibility Complex Class II-Peptide  
914 Complexes Internalize Using a Clathrin- and Dynamin-independent Endocytosis Pathway.  
915 *J Biol Chem*. 2008 May 23;283(21):14717–27.
- 916 53. Gao Y, Balut CM, Bailey MA, Patino-Lopez G, Shaw S, Devor DC. Recycling of the Ca<sup>2+</sup>-  
917 activated K<sup>+</sup> Channel, KCa2.3, Is Dependent upon RME-1, Rab35/EPI64C, and an N-  
918 terminal Domain. *J Biol Chem*. 2010 Jun 4;285(23):17938–53.
- 919 54. Sheehan P, Zhu M, Beskow A, Vollmer C, Waites CL. Activity-Dependent Degradation of  
920 Synaptic Vesicle Proteins Requires Rab35 and the ESCRT Pathway. *J Neurosci Off J Soc*  
921 *Neurosci*. 2016 17;36(33):8668–86.
- 922 55. Kouranti I, Sachse M, Arouche N, Goud B, Echard A. Rab35 Regulates an Endocytic  
923 Recycling Pathway Essential for the Terminal Steps of Cytokinesis. *Curr Biol*. 2006 Sep  
924 5;16(17):1719–25.
- 925 56. Chesneau L, Dambournet D, Machicoane M, Kouranti I, Fukuda M, Goud B, et al. An  
926 ARF6/Rab35 GTPase Cascade for Endocytic Recycling and Successful Cytokinesis. *Curr*  
927 *Biol*. 2012 Jan 24;22(2):147–53.
- 928 57. Shim J, Lee S-M, Lee MS, Yoon J, Kweon H-S, Kim Y-J. Rab35 mediates transport of Cdc42  
929 and Rac1 to the plasma membrane during phagocytosis. *Mol Cell Biol*. 2010  
930 Mar;30(6):1421–33.
- 931 58. Dambournet D, Machicoane M, Chesneau L, Sachse M, Rocancourt M, Marjou AE, et al.  
932 Rab35 GTPase and OCRL phosphatase remodel lipids and F-actin for successful  
933 cytokinesis. *Nat Cell Biol*. 2011 Aug;13(8):981.
- 934 59. Chevallier Julien, Koop Charles, Srivastava Archana, Petrie Ryan J., Lamarche-Vane  
935 Nathalie, Presley John F. Rab35 regulates neurite outgrowth and cell shape. *FEBS Lett*.  
936 2009 Mar 14;583(7):1096–101.

- 937 60. Marat AL, McPherson PS. The Connecdenn Family, Rab35 Guanine Nucleotide Exchange  
938 Factors Interfacing with the Clathrin Machinery. *J Biol Chem.* 2010 Apr 2;285(14):10627–  
939 37.
- 940 61. Zhang J, Fonovic M, Suyama K, Bogyo M, Scott MP. Rab35 controls actin bundling by  
941 recruiting fascin as an effector protein. *Science.* 2009 Sep 4;325(5945):1250–4.
- 942 62. Minowa-Nozawa A, Nozawa T, Okamoto-Furuta K, Kohda H, Nakagawa I. Rab35 GTPase  
943 recruits NDP52 to autophagy targets. *EMBO J.* 2017 15;36(18):2790–807.
- 944 63. Wheeler DB, Zoncu R, Root DE, Sabatini DM, Sawyers CL. Identification of an oncogenic  
945 RAB protein. *Science.* 2015 Oct 9;350(6257):211–7.
- 946 64. Egami Y, Fukuda M, Araki N. Rab35 regulates phagosome formation through recruitment  
947 of ACAP2 in macrophages during FcγR-mediated phagocytosis. *J Cell Sci.* 2011 Nov  
948 1;124(21):3557–67.
- 949 65. Egami Y, Fujii M, Kawai K, Ishikawa Y, Fukuda M, Araki N. Activation-Inactivation Cycling  
950 of Rab35 and ARF6 Is Required for Phagocytosis of Zymosan in RAW264 Macrophages  
951 [Internet]. *Journal of Immunology Research.* 2015 [cited 2017 Dec 6]. Available from:  
952 <https://www.hindawi.com/journals/jir/2015/429439/>
- 953 66. Stroschein-Stevenson SL, Foley E, O’Farrell PH, Johnson AD. Identification of *Drosophila*  
954 gene products required for phagocytosis of *Candida albicans*. *PLoS Biol.* 2006 Jan;4(1):e4.
- 955 67. Smith AC, Heo WD, Braun V, Jiang X, Macrae C, Casanova JE, et al. A network of Rab  
956 GTPases controls phagosome maturation and is modulated by *Salmonella enterica*  
957 serovar Typhimurium. *J Cell Biol.* 2007 Jan 29;176(3):263–8.
- 958 68. Cai H, Reinisch K, Ferro-Novick S. Coats, tethers, Rabs, and SNAREs work together to  
959 mediate the intracellular destination of a transport vesicle. *Dev Cell.* 2007  
960 May;12(5):671–82.
- 961 69. Kinchen JM, Ravichandran KS. Identification of two evolutionarily conserved genes  
962 regulating processing of engulfed apoptotic cells. *Nature.* 2010 Apr 1;464(7289):778–82.
- 963 70. Li W, Zou W, Zhao D, Yan J, Zhu Z, Lu J, et al. *C. elegans* Rab GTPase activating protein  
964 TBC-2 promotes cell corpse degradation by regulating the small GTPase RAB-5.  
965 *Development.* 2009 Jul 15;136(14):2445–55.
- 966 71. Klinkert K, Echard A. Rab35 GTPase: A Central Regulator of Phosphoinositides and F-actin  
967 in Endocytic Recycling and Beyond. *Traffic.* 2016 Oct 1;17(10):1063–77.
- 968 72. Nookala RK, Langemeyer L, Pacitto A, Ochoa-Montañó B, Donaldson JC, Blaszczyk BK, et  
969 al. Crystal structure of folliculin reveals a hidDENN function in genetically inherited renal  
970 cancer. *Open Biol.* 2012 Aug 1;2(8):120071.
- 971 73. Zheng J, Duan B, Sun S, Cui J, Du J, Zhang Y. Folliculin Interacts with Rab35 to Regulate  
972 EGF-Induced EGFR Degradation. *Front Pharmacol.* 2017;8:688.

- 973 74. Pfeffer S, Aivazian D. Targeting Rab GTPases to distinct membrane compartments. *Nat*  
974 *Rev Mol Cell Biol.* 2004 Nov;5(11):886–96.
- 975 75. Heo WD, Inoue T, Park WS, Kim ML, Park BO, Wandless TJ, et al. PI(3,4,5)P3 and PI(4,5)P2  
976 lipids target proteins with polybasic clusters to the plasma membrane. *Science.* 2006 Dec  
977 1;314(5804):1458–61.
- 978 76. Gavriljuk K, Itzen A, Goody RS, Gerwert K, Kötting C. Membrane extraction of Rab  
979 proteins by GDP dissociation inhibitor characterized using attenuated total reflection  
980 infrared spectroscopy. *Proc Natl Acad Sci.* 2013 Aug 13;110(33):13380–5.
- 981 77. Li F, Yi L, Zhao L, Itzen A, Goody RS, Wu Y-W. The role of the hypervariable C-terminal  
982 domain in Rab GTPases membrane targeting. *Proc Natl Acad Sci.* 2014 Feb  
983 18;111(7):2572–7.
- 984 78. Kwiatkowska K. One lipid, multiple functions: how various pools of PI(4,5)P(2) are created  
985 in the plasma membrane. *Cell Mol Life Sci CMLS.* 2010 Dec;67(23):3927–46.
- 986 79. Ellis RE, Jacobson DM, Horvitz HR. Genes required for the engulfment of cell corpses  
987 during programmed cell death in *Caenorhabditis elegans*. *Genetics.* 1991 Sep  
988 1;129(1):79–94.
- 989 80. D’mello V, Birge RB. Apoptosis: Conserved Roles for Integrins in Clearance. *Curr Biol.*  
990 2010 Apr 13;20(7):R324–7.
- 991 81. Neukomm LJ, Zeng S, Frei AP, Huegli PA, Hengartner MO. Small GTPase CDC-42 promotes  
992 apoptotic cell corpse clearance in response to PAT-2 and CED-1 in *C. elegans*. *Cell Death*  
993 *Differ.* 2014 Jun;21(6):845.
- 994 82. Carlson JM, Doyle J. Complexity and robustness. *Proc Natl Acad Sci U S A.* 2002 Feb 19;99  
995 *Suppl 1*:2538–45.
- 996 83. Kitano H. Cancer robustness: tumour tactics. *Nature.* 2003 Nov 13;426(6963):125.
- 997 84. Kitano H. Biological robustness. *Nat Rev Genet.* 2004 Nov;5(11):826–37.
- 998 85. Rovenský J, Tuchynová A. Systemic lupus erythematosus in the elderly. *Autoimmun Rev.*  
999 2008 Jan;7(3):235–9.
- 1000 86. Thakkar JP, McCarthy BJ, Villano JL. Age-specific cancer incidence rates increase through  
1001 the oldest age groups. *Am J Med Sci.* 2014 Jul;348(1):65–70.
- 1002 87. Erwig L-P, Henson PM. Immunological Consequences of Apoptotic Cell Phagocytosis. *Am J*  
1003 *Pathol.* 2007 Jul 1;171(1):2–8.
- 1004 88. Brenner S. The genetics of *Caenorhabditis elegans*. *Genetics.* 1974 May;77(1):71–94.
- 1005 89. Jin Y. *C elegans: A Practical Approach*. Hope I, editor. New York: Oxford University Press;  
1006 1999. 69–96 p. (Transformation).

- 1007 90. Bloom L, Horvitz HR. The *Caenorhabditis elegans* gene *unc-76* and its human homologs  
1008 define a new gene family involved in axonal outgrowth and fasciculation. *Proc Natl Acad*  
1009 *Sci U S A*. 1997 Apr 1;94(7):3414–9.
- 1010 91. Kamath RS, Martinez-Campos M, Zipperlen P, Fraser AG, Ahringer J. Effectiveness of  
1011 specific RNA-mediated interference through ingested double-stranded RNA in  
1012 *Caenorhabditis elegans*. *Genome Biol*. 2001;2(1):RESEARCH0002.
- 1013 92. Kamath RS, Fraser AG, Dong Y, Poulin G, Durbin R, Gotta M, et al. Systematic functional  
1014 analysis of the *Caenorhabditis elegans* genome using RNAi. *Nature*. 2003 Jan  
1015 16;421(6920):231–7.
- 1016 93. Kamath RS, Ahringer J. Genome-wide RNAi screening in *Caenorhabditis elegans*. *Methods*  
1017 *San Diego Calif*. 2003 Aug;30(4):313–21.

1018

## 1019 **Figure Legends:**

### 1020 **Fig 1. *rab-35(b1013)* mutants are defective in the clearance of apoptotic cells.**

1021 All p-values were measured relative to wild-type. The student t-test was used for data  
1022 analysis: \*,  $0.001 < p < 0.05$ ; \*\*,  $0.00001 < p < 0.001$ ; \*\*\*,  $p < 0.00001$ ; ns, no significant  
1023 difference. (A) The numbers of germ cell corpses were scored in 48-hour post-L4 adult  
1024 gonads. A minimum of 15 animals were scored. Germ cell corpses were counted (a)  
1025 after RNAi treatment of 17 *C. elegans* genes encoding RAB proteins, and (b) in wild-type  
1026 and *rab-10(ok1494)* mutant strains. (B) The locations of the two null alleles of *rab-35* in  
1027 the *rab-35* gene structure. Black rectangles mark exons. The blue rectangle indicates the  
1028 location of the deletion in the *tm2058* allele. The arrow marks the position of the  
1029 nonsense mutation carried in the *b1013* allele. (C) The numbers of cell corpses were  
1030 scored at various developmental stages: 1.5-fold embryos, 4-fold embryos, and the 48-  
1031 hour post-L4 adult gonad. For each data point, at least 15 animals were scored. Mean  
1032 numbers were presented as bars. Error bars indicate standard deviation (sd). (D)

1033 Differential interference contrast (DIC) microscopy images of adult gonads of (a) wild-  
1034 type and (b) *rab-35(b1013)* mutants. White arrows mark germ cell corpses. (E) The  
1035 ventral surface of an *rab-35(b1013)* embryo that expresses MFG-E8::mcherry was  
1036 visualized using both the mCherry (a) and DIC (b) channels at ~330 minutes post-first  
1037 cleavage. White arrows mark the presence of MFG-E8::mcherry on C1, C2, and C3 in  
1038 (a), and the cell corpses C1, C2, and C3 in (b). (F) The *gfp::rab-35* transgene expressed  
1039 in engulfing cells is able to rescue the *rab-35* mutant phenotype. The mean numbers of  
1040 cell corpses in 1.5-fold stage embryos in strains carrying or not carrying  $P_{ced-1gfp}::rab-35$   
1041 were presented in the bar graph.. For each data point, at least 15 animals were scored.  
1042 Error bars represent sd.

1043

1044 **Fig 2. RAB-35 is localized to extending pseudopods and further enriched on nascent**  
1045 **phagosomes.**

1046 All GFP reporters are expressed in engulfing cells under the control of  $P_{ced-1}$ . All p-  
1047 values were measured relative to wild-type. The student t-test was used for data analysis:  
1048 \*,  $0.001 < p < 0.05$ ; \*\*,  $0.00001 < p < 0.001$ ; \*\*\*,  $p < 0.00001$ ; ns, no significant  
1049 difference. (A) Diagram illustrating the features that allow for the visualization of ventral  
1050 enclosure and apoptotic cell clearance. The start of ventral enclosure is defined as the  
1051 moment the two ventral hypodermal cells (ABpraapppp and ABplaapppp) start extending  
1052 to the ventral midline. Both the position of cell corpses C1, C2, and C3 (brown dots) as  
1053 well as the identity of their engulfing cells are shown. (B) Time-lapse recording of  
1054 GFP::RAB-35 during the engulfment and degradation of cell corpse C3 in a wild-type  
1055 embryo. “0 min” indicates the formation of the nascent phagosome. Arrowheads mark

1056 the extending pseudopods. A whole arrow marks the nascent phagosome. (C) Graph  
1057 showing the relative GFP::*RAB-35* signal intensity over time on the surface of  
1058 pseudopods and the phagosome in images shown in B. The fluorescence intensity of  
1059 GFP was measured on the phagosomal surface and in the surrounding cytoplasm every 2  
1060 minutes, starting from the “0 min” time point. The phagosomal / cytoplasmic signal ratio  
1061 over time was presented. Data is normalized relative to the signal ratio at the “0 min”  
1062 time point. (D) The mean numbers of apoptotic cell corpses scored in 1.5-fold stage  
1063 wild-type or *rab-35(b1013)* mutant embryos, in the presence or absence of transgenes  
1064 overexpressing dominant negative GFP::*RAB-35(S24N)* or constitutively active  
1065 GFP::*RAB-35(Q69L)*, were presented in this bar graph. For each data point, at least 15  
1066 animals were scored. Error bars indicate sd. (E) The localization of GFP::*RAB-*  
1067 *35(S24N)* and GFP::*RAB-35(Q69L)* during the engulfment of C3 and the early stage of  
1068 phagosome maturation is presented in time-lapse images. “0 min” indicates the  
1069 formation of the nascent phagosome. Arrowheads indicate extending pseudopods. A  
1070 white arrow marks the nascent phagosome. Regions with enriched GFP::*RAB-35(Q69L)*  
1071 signal on the phagosomal membrane are marked by yellow arrows. (F) Epistasis analysis  
1072 between *rab-35* and genes that encode candidate GAP proteins for *RAB-35*. The mean  
1073 numbers of apoptotic cell corpses scored in 1.5-fold stage wild-type and various single  
1074 and double mutant combinations are presented in this bar graph. *tbc-7* was inactivated by  
1075 RNAi. For each data point, at least 15 animals were scored. Error bars indicate sd. (G)  
1076 Epistasis analysis between *rab-35* and genes that encode candidate GEF proteins for  
1077 *RAB-35*. The mean numbers of apoptotic cell corpses scored in 1.5-fold stage wild-type  
1078 and various single and double mutant combinations are presented in this bar graph. For



1079 each data point, at least 15 animals were scored. Error bars indicate sd. (H) Time-lapse  
1080 recording of GFP::*RAB-35* during the engulfment and degradation of cell corpse C3 in  
1081 *tbc-10(tm2790)* mutant embryos. “0 min” indicates the formation of the nascent  
1082 phagosome. Arrowheads mark the extending pseudopod. A white arrow marks the  
1083 nascent phagosome. Regions with enriched GFP::*RAB-35* signal on the phagosomal  
1084 membrane are marked by yellow arrows.

1085

1086 **Fig 3. *rab-35* mutants exhibit delays in the recruitment of early endosomes, but not**  
1087 **lysosomes, to phagosomes.**

1088 (A) Diagram outlining the experiment strategy to measure the life span of a phagosome.  
1089 GFP::*moesin(aa299-578)*, which labels pseudopods, serves to mark the “0 min” time  
1090 point of the formation of a nascent phagosome, while CTNS-1::*mRFP*, a lysosome  
1091 marker, acts to track the recruitment and fusion of lysosomes to the phagosome as well as  
1092 to label the phagosome during the subsequent digestion of the cell corpse. (B) Histogram  
1093 displaying the life span of phagosomes bearing cell corpses C1, C2, and C3 in wild-type  
1094 and *rab-35(b1013)* embryos. The life span of a phagosome is defined as the time interval  
1095 between the “0 min” time point when a nascent phagosome is initially formed and the  
1096 time point when a phagosome shrinks to one-third of its measured radius at “0 min”. For  
1097 each genotype, at least 15 phagosomes were scored. (C) Histogram displaying the range  
1098 of time it takes for early endosomes to be recruited to the phagosomal surface in wild-  
1099 type and *rab-35(b1013)* embryos. Phagosomes bearing cell corpses C1, C2, and C3 were  
1100 scored. The time span of early endosome recruitment is measured as the time interval  
1101 between “0 min” and the time point when the accumulating early endosomes first form a

1102 continuous ring around a phagosome. For each genotype, at least 15 phagosomes were  
1103 scored. (D) Time-lapse images monitoring the recruitment of early endosomes (reporter:  
1104 HGRS-1::GFP) to the phagosomal surface after a phagosome forms (the “0 min” time  
1105 point). The monitored cell corpses (white arrows) are visualized using DIC microscopic  
1106 images. Arrowheads indicate extending pseudopods. The GFP ring, when it is first  
1107 completed around the phagosome, is labeled with a yellow arrow. (E) Time-lapse image  
1108 series showing the processes of the engulfment and the degradation process of a  
1109 phagosome bearing the cell corpse C3 in each of the wild-type and *rab-35(b1013)*  
1110 embryos, using GFP::moesin(aa299-578) as the pseudopod reporter and CTNS-1::mRFP  
1111 as a lysosome marker. “0 min” indicates the formation of the nascent phagosome.  
1112 Arrowheads indicate extending pseudopods. A white arrow marks the nascent  
1113 phagosome.

1114

1115 **Fig 4. RAB-35 is enriched on phagosomal surfaces during the PtdIns(4,5)P<sub>2</sub> to**  
1116 **PtdIns(3)P shift and functions in PtdIns(4,5)P<sub>2</sub> removal.**

1117 (A) Time-lapse images during and after the formation of a phagosome carrying C3 in a  
1118 wild-type embryo co-expressing  $P_{ced-1}$  *mKate2::rab-35* and the PtdIns(4,5)P<sub>2</sub> marker  $P_{ced-1}$   
1119 *PH(hPLCγ)::gfp*. “0 min” indicates the formation of the nascent phagosome.  
1120 Arrowheads indicate extending pseudopods. White arrows mark the nascent phagosome,  
1121 while yellow arrows mark both the gain of mKate2::RAB-35 and the loss of  
1122 PH(hPLCγ)::GFP from the phagosomal surface. (B) Time-lapse images during and after  
1123 the formation of a phagosome carrying C3 in a wild-type embryo co-expressing  $P_{ced-1}$

1124 *gfp::rab-35* and the PtdIns(3)P marker  $P_{ced-1} 2xFYVE::mRFP$ . “0 min” indicates the  
1125 formation of the nascent phagosome. Arrowheads indicate extending pseudopods. White  
1126 arrows mark the nascent phagosome, while yellow arrows mark both the gain of  
1127 GFP::RAB-35 and the loss of 2xFYVE::mRFP. (C) Time-lapse images during and after  
1128 the formation of a phagosome carrying C3 in embryos of different genotypes expressing  
1129  $P_{ced-1} PH(hPLC\gamma)::gfp$ . “0 min” indicates the formation of the nascent phagosome.  
1130 Arrowheads indicate extending pseudopods. White arrows mark the nascent phagosome,  
1131 while yellow arrows mark the first time point when PtdIns(4,5)P<sub>2</sub> is no longer observed  
1132 on the phagosome surface. (D) Histograms displaying the range of time it takes for the  
1133 disappearance of PtdIns(4,5)P<sub>2</sub> from the surface of phagosomes bearing C1, C2, and C3  
1134 in embryos of various genotypes. *rab-35* mutants are coupled with null mutations in *ced-*  
1135 *I* (a) and *ced-5* (b). The time span of PtdIns(4,5)P<sub>2</sub> disappearance is scored as the time  
1136 interval between the formation of a nascent phagosome (“0 min”) and the first time point  
1137 that the PH(hPLC $\gamma$ )::GFP signal is no longer enriched on the phagosomal surface. For  
1138 each genotype, at least 15 phagosomes were scored.

1139

1140 **Fig 5. *rab-35* and *ced-1* function in parallel to produce PtdIns(3)P on the phagosomal**  
1141 **membrane.**

1142 (A) Time-lapse images during and after the formation of a phagosome carrying C3 in  
1143 embryos of different genotypes expressing  $P_{ced-1} 2xFYVE::mRFP$ . “0 min” indicates the  
1144 formation of the nascent phagosome, determined using the pseudopod marker  
1145 GFP::moesin(aa299-578) [not shown]. White arrows indicate the time point when 1<sup>st</sup>

1146 wave of PtdIns(3)P appears on the nascent phagosome. Yellow arrows mark the time  
1147 point when the 2<sup>nd</sup> wave of PtdIns(3)P appears on the phagosome. (B) Histogram  
1148 displaying the range of time it takes for the 1<sup>st</sup> peak of PtdIns(3)P to appear on  
1149 phagosomes in wild-type, *rab-35(b1013)*, and either *ced-1(n1506)* and *rab-35(b1013)*;  
1150 *ced-1(n1506)* (a) or *ced-5(n1812)* and *rab-35(b1013)*; *ced-5(n1812)* (b) embryos.  
1151 Phagosomes bearing cell corpses C1, C2, and C3 were scored. “0 min” indicates the  
1152 formation of the nascent phagosome. This time interval is defined as that between the  
1153 formation of a nascent phagosome (“0 min”) and the first time point that the 1<sup>st</sup> wave of  
1154 PtdIns(3)P appears on the phagosome surface. For each genotype, at least 15  
1155 phagosomes were scored. (C) The frequency of appearance of the 1<sup>st</sup> and 2<sup>nd</sup> peaks of  
1156 PtdIns(3)P on phagosomes carrying C1, C2, and C3 in wild-type, *rab-35(b1013)*, *ced-*  
1157 *1(n1506)*, and *rab-35(b1013)*; *ced-1(n1506)* embryos. For each genotype, at least 15  
1158 phagosomes were scored.

1159

1160 **Fig 6. The *rab-35(b1013)* mutation impairs MTM-1 removal from, and SNX-1**  
1161 **recruitment to, phagosomal surfaces.**

1162 (A) Time-lapse images during and after the formation of a phagosome carrying C3 in  
1163 embryos of different genotypes expressing *P<sub>ced-1</sub> mtm-1::gfp*. “0 min” indicates the  
1164 formation of the nascent phagosome. Arrowheads indicate extending pseudopods. White  
1165 arrows and yellow arrows indicate the time points when MTM-1::GFP first and last  
1166 appear on the phagosome surface, respectively. (B) Time-lapse images during and after  
1167 the formation of a phagosome carrying C3 in embryos of different genotypes expressing  
1168 *P<sub>ced-1</sub> snx-1::gfp*. “0 min” indicates the formation of the nascent phagosome. Arrowheads

1169 indicate extending pseudopods. White arrows mark the regions on the phagosomal  
1170 surface that have an enriched GFP signal. (C) Histogram displaying the range of time  
1171 that MTM-1 persists on phagosomes in wild-type and *rab-35(b1013)* embryos.  
1172 Phagosomes bearing cell corpses C1, C2, and C3 were scored. “0 min” indicates the  
1173 formation of the nascent phagosome. This time interval is defined as that between the  
1174 formation of a nascent phagosome (“0 min”) and the first time point that MTM-1 is no  
1175 longer found on the phagosome. For each genotype, at least 15 phagosomes were scored.  
1176 (D) The efficiency of recruitment of SNX-1::GFP (a) and LST-4::GFP (b) to the surface  
1177 of phagosomes carrying C1, C2, and C3 was scored in various genotypes. SNX-1::GFP  
1178 is enriched onto phagosomal surfaces in two different patterns, either distributed onto the  
1179 entire phagosomal surface evenly (“continuous”) or attached to phagosomal surfaces as  
1180 puncta (“punctate”) (a), whereas LST-4::GFP is enriched onto phagosomes only in the  
1181 “continuous” pattern (b). For each genotype, at least 15 phagosomes were scored.

1182

1183 **Fig 7. *rab-35* functions upstream of and promotes the phagosomal localization of**  
1184 ***rab-5*.**

1185 (A) Time-lapse images after the formation of a phagosome carrying C3 in a wild-type  
1186 embryo co-expressing  $P_{ced-1} mrfp::rab-35$  and  $P_{ced-1} gfp::rab-5$ . “0 min” indicates the  
1187 formation of the nascent phagosome. A whole arrow marks the nascent phagosome. (B)  
1188 Time-lapse images during and after the formation of a phagosome carrying C3 in a wild-  
1189 type embryo expressing  $P_{ced-1} gfp::rab-5$ . “0 min” indicates the formation of the nascent  
1190 phagosome. Arrowheads indicate extending pseudopods. White arrows mark the  
1191 nascent phagosome, while yellow arrows mark the first time point when RAB-5 localizes

1192 to the phagosome. (C) Epistasis analysis was performed between *rab-5* and *rab-35*,  
1193 using RNAi to inactivate *rab-5*. To analyze the effect of reducing *rab-5* gene dosage, *E.*  
1194 *coli* carrying the *rab-5* RNAi construct was diluted by mixing with *E. coli* carrying an  
1195 empty vector. After RNAi treatment, the numbers of apoptotic cell corpses were scored  
1196 in the F1 progeny at the 1.5-fold embryonic stage. For each data point, at least 15  
1197 embryos were scored. \*,  $0.001 < p < 0.05$ ; \*\*,  $0.00001 < p < 0.001$ ; \*\*\*,  $p < 0.00001$ ; ns,  
1198 no significant difference. (D) Histograms displaying the range of time it takes for the  
1199 appearance of RAB-5 on the surface of phagosomes bearing C1, C2, and C3 in embryos  
1200 of various genotypes. The histograms exhibit the effect of *rab-35* loss of function in  
1201 wild-type (a) and *ced-1(n1506)* (b) backgrounds. The time span of RAB-5 appearance is  
1202 scored as the time interval between the formation of a nascent phagosome (“0 min”) and  
1203 the first time point that the GFP::RAB-5 signal becomes enriched on the phagosomal  
1204 surface. For each genotype, at least 15 phagosomes were scored.

1205

1206 **Fig 8. RAB-35, CED-1, and CED-5 function in parallel to engulf apoptotic cell**  
1207 **corpses.**

1208 (A) Images of part of a 1.5-fold stage embryo expressing  $P_{ced-1}ced-1\Delta C::gfp$ . CED-  
1209  $1\Delta C::GFP$  is utilized to determine whether a cell corpse is engulfed. DIC morphology is  
1210 used to mark cell corpses. Red arrows indicate an engulfed cell corpse, which is  
1211 surrounded by a CED- $1\Delta C::GFP$  ring. Yellow arrows indicate an unengulfed cell corpse,  
1212 which lacks CED- $1\Delta C::GFP$  on its surface. (B) In 1.5-fold to 2-fold stage embryos of  
1213 various genotypes, the fraction of cell corpses that had been engulfed was measured using  
1214 the CED- $1\Delta C$  reporter. For each genotype, at least 15 embryos were scored. (C)

1215 Diagram outlining the assays used to determine the moments of cell corpse recognition  
1216 and internalization utilizing the CED-1 $\Delta$ C::GFP reporter. The moment of recognition is  
1217 defined as the first time point GFP is seen enriched in a region in contact between the  
1218 engulfing and dying cell, with the moment of ventral enclosure used as a reference point  
1219 (“0 min”). The period of pseudopod extension is defined as the time span between the  
1220 moment of recognition and the moment when the nascent phagosome forms. (D) Time-  
1221 lapse images before and after the formation of a phagosome carrying C3 in embryos of  
1222 different genotypes expressing *P<sub>ced-1</sub> $\Delta$ C::gfp*. “0 min” indicates the initiation of  
1223 ventral enclosure. Arrowheads indicate extending pseudopods. A white arrow marks the  
1224 nascent phagosome. Yellow arrows label the extending ventral hypodermal cell  
1225 ABpraapppp. For each genetic background, a single asterisk marks the time point when  
1226 recognition is first observed, while two asterisks marks the time point when the nascent  
1227 phagosome is formed.

1228

1229 **Fig 9. *rab-35* represents a third engulfment pathway independent of both the *ced-1/-***  
1230 ***6/-7* and *ced-2/-5/-10/-12* pathways.**

1231 The average numbers of cell corpses in 1.5-fold stage embryos of various genotypes are  
1232 presented as bars in the bar graphs. Error bars indicate sd. The student *t*-test was used  
1233 for data analysis: \*, 0.001 < p < 0.05; \*\*, 0.00001 < p < 0.001; \*\*\*, p < 0.00001; ns, no  
1234 significant difference. For each data point, at least 15 animals were scored. (A) Results  
1235 of epistasis analysis performed between *rab-35* and components of the *ced-1/-6/-7*  
1236 pathway. Null alleles [*rab-35(b1013)*, *ced-1(n1506)*, and *ced-6(n2095)*] were used. (B)  
1237 Results of epistasis analysis performed between *rab-35* and components of the *ced-2/-5/-*

1238 *10/-12* pathway. Null alleles [*ced-5(n1812)* and *ced-12(n3261)*] were used; however,  
1239 null alleles of *ced-10* (*C. elegans* ortholog of mammalian Rac1) are embryonic lethal, so  
1240 a severe loss-of-function allele (*n1993*) was used instead. (C) Diagram illustrating the  
1241 role of RAB-35 in the engulfment and degradation of cell corpses in *C. elegans*. Please  
1242 see Discussion for more details. RAB-35 functions in parallel with the *ced-1/-6/-7/dyn-1*  
1243 and *ced-2/-5/-10/-12* pathways in the recognition of cell corpses, while RAB-35 and  
1244 CED-1 function in parallel during phagosome maturation. RAB-35 helps to recruit RAB-  
1245 5, which promotes the production of PtdIns(3)P. Furthermore, RAB-35 stimulates the  
1246 turnover of both PtdIns(4,5)P<sub>2</sub> and its effector MTM-1, a PI-3 phosphatase. In turn,  
1247 PtdIns(3)P promotes the recruitment of the sorting nexins SNX-1, SNX-6, and LST-4 as  
1248 well as the Rab GTPases RAB-2, RAB-5, and RAB-7, allowing for the progression of  
1249 phagosome maturation and cell corpse degradation. Among the three sorting nexins, *rab-*  
1250 *35* mutants are defective in the recruitment of SNX-1 but not LST-4/SNX-9 to  
1251 phagosomes, suggesting that the effect might be too weak to measure and/or that other  
1252 factors may be involved in their recruitment.

1253

### 1254 **Supplemental Figure Legends:**

1255 **Fig S1. Loss of function of *rab-35* causes the appearance of excess yolk in the**  
1256 **pseudocoelom.**

1257 (A) Differential interference contrast (DIC) microscopy images of adult gonads of (a)  
1258 wild-type and (b) *rab-35(b1013)* mutants. White arrows mark pools of yolk. *rab-*  
1259 *35(b1013)* mutants contain excess yolk in the pseudocoelom compared to wild-type. (B)



1260 Wild-type and *rab-35(b1013)* mutant worms were visualized as adults using DIC  
1261 microscopy, characterized based on the yolk coverage, and separated into four distinct  
1262 groups. (C) Wild-type and *rab-35(b1013)* were scored as 24-hour and 48-hour post-L4  
1263 adults based on yolk coverage.

1264

1265 **Fig S2. TBC-10, RME-4, and FLCN-1 are orthologs of mammalian TBC1D10A,**  
1266 **connecdenn 1/2/3, and folliculin, respectively.**

1267 (A) Homology between TBC-10 and its human ortholog, TBC1D10A. TBC-10 and  
1268 TBC1D10A share 29.6% identity and 42.3% similarity overall, and share 61.6% identity  
1269 and 73.5% similarity within the highly conserved TBC (Tre-2/Bub2/Cdc16) GAP  
1270 domain. The TBC domain is highlighted in yellow. All alignments were performed  
1271 using EMBOSS Needle. Asterisks (\*) indicate identical amino acids, colons (:) indicate  
1272 similar substitutions, periods (.) indicate non-similar substitutions, and dashes (-) indicate  
1273 areas where no alignment was possible. The residues absent in *tbc-10(tm2790)* mutants  
1274 are highlighted in red, while residues absent in *tbc-10(tm2907)* are highlighted in blue.

1275 (B) Homology between the first 500 residues of RME-4 and its human orthologs,  
1276 DENND1A/connecdenn 1, DENND1B/connecdenn 2, and DENND1C/connecdenn 3  
1277 [only DENND1A is shown]. RME-4 shares 22.5% identity and 34.9% similarity overall  
1278 with DENND1A; 23.6% identity and 37.4% with DENND1B; and 26.4% identity and  
1279 40.2% similarity with DENND1C. Within the more highly conserved DENN  
1280 (differentially expressed in normal and neoplastic tissue) GEF domain, these values  
1281 increase to 41.0% identity/67.6% similarity; 40.3% identity/66.9% similarity; and  
1282 41.7%/65.5%, respectively. The uDENN (upstream of DENN) domain is highlighted in

1283 blue, the DENN domain is highlighted in yellow, and the dDENN (downstream of  
1284 DENN) domain is highlighted in green. The residues absent in *rme-4(tm1865)* mutants  
1285 are highlighted in red. (C) Homology between FLCN-1 and its human ortholog  
1286 folliculin. FLCN-1 and folliculin have non-canonical DENN domains, and unlike their  
1287 counterparts found within RME-1 and DENND1A/B/C, they are not specifically  
1288 conserved during evolution. FLCN-1 and human folliculin share 23.4% identity and  
1289 39.9% similarity overall, and 21.8% identity and 37.0% similarity with their DENN  
1290 domains. The residues absent in *flcn-1(ok975)* mutants are highlighted in red.

1291

1292 **Fig S3. In *rab-35(b1013)* mutants, recruitment of lysosomes to phagosomes is**  
1293 **normal.**

1294 (A) Time-lapse images monitoring the recruitment and fusion of lysosomes to the  
1295 phagosomal surface (white arrows) after a phagosome forms (the “0 min” time point).  
1296 Lysosomal fusion is monitored using a mcherry-tagged lysosomal lumen marker [NUC-  
1297 1::mcherry]. The GFP-tagged PH domain of human phospholipase C $\gamma$   
1298 [PH(hPLC $\gamma$ ):GFP], which labels PtdIns(4,5)P $_2$  and extending phagosomes, is used to  
1299 indicate the “0 min” time point when a phagosome forms. (B) Histogram displaying the  
1300 range of time it takes for lysosomes to be recruited to the phagosomal surface in wild-  
1301 type and *rab-35(b1013)* embryos. Phagosomes bearing cell corpses C1, C2, and C3 were  
1302 scored. This time interval is defined as that between the “0 min” time point when a  
1303 nascent phagosome is initially formed and the time point when a continuous CTNS-  
1304 1::mRFP signal is observed on the phagosome. For each genotype, at least 15  
1305 phagosomes were scored. (C) Histogram displaying range of time it takes for lysosomes

1306 to fuse to phagosomes in wild-type and *rab-35(b1013)* embryos. Phagosomes bearing  
1307 cell corpses C1, C2, and C3 were scored. The time span of lysosome fusion is measured  
1308 as the time interval between “0 min” and the time point when the NUC-1::mCherry signal  
1309 completely fills the phagosomal lumen. For each genotype, at least 15 phagosomes were  
1310 scored.

1311

1312 **Fig S4. PIKI-1 recruitment to the phagosome is normal in *rab-35(b1013)* mutants.**

1313 (A) Recruitment of the GFP-tagged class II PtdIns(3)P kinase GFP::PIKI-1 to nascent  
1314 phagosomes was measured using live imaging of C1, C2, and C3 in wild-type and *rab-*  
1315 *35(b1013)* mutant embryos at the 1.5-fold stage. The presence or absence of PIKI-1 on  
1316 the phagosomes was scored on each phagosome and reported as a percentage for each  
1317 genetic background. There was no significant decrease in the frequency of PIKI-1  
1318 recruitment in *rab-35(b1013)* mutants. (B) The intensity of PIKI-1 recruitment was  
1319 measured in C1, C2, and C3. For each phagosome, the intensity of PIKI-1 signal was  
1320 measured on the phagosome membrane and in the surrounding cytoplasm at the time  
1321 point of maximal PIKI-1 phagosomal signal and expressed as a ratio. No statistically  
1322 significant increase in PIKI-1 phagosomal intensity was observed in *rab-35(b1013)*  
1323 mutants.

1324

1325 **Fig S5. *rab-35(b1013)* mutants display defects in apoptotic cell corpse recognition,**  
1326 **but are normal for pseudopod extension.**

1327 (A) The time it takes for engulfing cells to recognize cell corpses C1, C2, or C3 was  
1328 determined in embryos of different genotypes using the GFP::*CED-1* $\Delta$ C reporter. The  
1329 moment of recognition is defined as the first time point GFP is seen enriched in a region  
1330 in contact between the engulfing and dying cell, with the moment of ventral enclosure  
1331 used as a reference point (“0 min”). Histograms (a-d) and the summary (e-f) statistics are  
1332 presented. For each strain, at least 15 engulfment events were scored. (B) The time it  
1333 takes for C1, C2, or C3 to be internalized after they are recognized by the engulfing cells  
1334 was determined in embryos of different genotypes using the GFP::*CED-1* $\Delta$ C reporter.  
1335 Internalization is defined as the time interval between recognition of the dying cell by  
1336 engulfing cells (“0 min”) and the time point that the nascent phagosome is formed.  
1337 Histograms (a-d) and the summary (e-f) statistics are presented. For each strain, at least  
1338 15 engulfment events were scored.

1339

1340 **Fig S6. *rab-35(b1013)* mutants display an enhanced Ced phenotype in response to**  
1341 **heat shock treatment.**

1342 The mean numbers of apoptotic cell corpses were scored in 1.5-fold stage wild-type or  
1343 *rab-35(b1013)* mutant embryos. The scoring was performed either with or without heat  
1344 shock as well as in the presence or absence of transgenes overexpressing dominant  
1345 negative GFP::*RAB-5(S33N)* under a heat shock promoter. For each data point, at least  
1346 15 animals were scored. Error bars indicate sd.

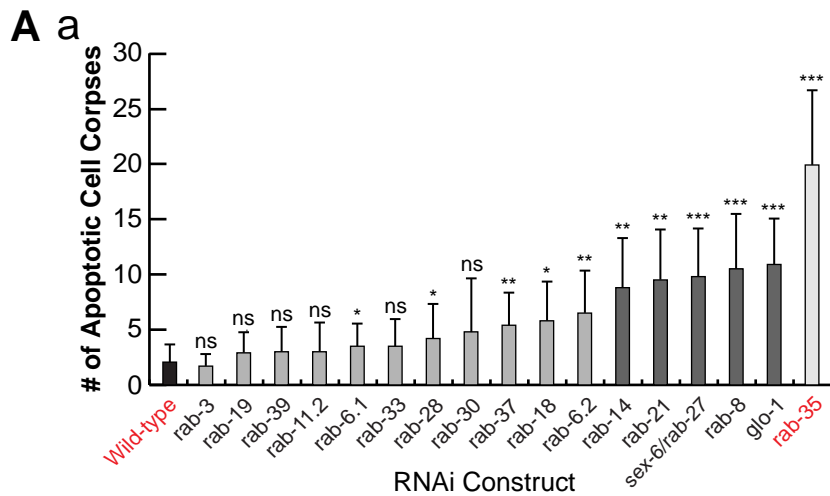

**b**

| Genotype              | #Germ cell corpse |
|-----------------------|-------------------|
| wild-type             | 2.5±1.7           |
| <i>rab-10(ok1494)</i> | 1.5±1.2           |

The number of cell corpses were counted per gonad arm; shown as mean ± sd. For each strain, n ≥ 15.

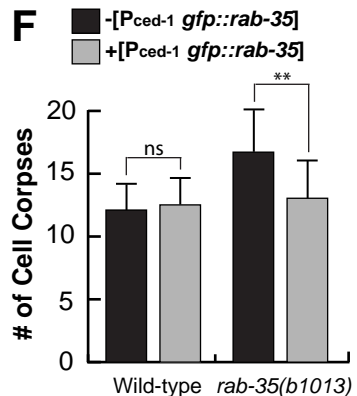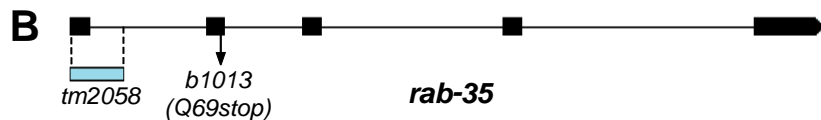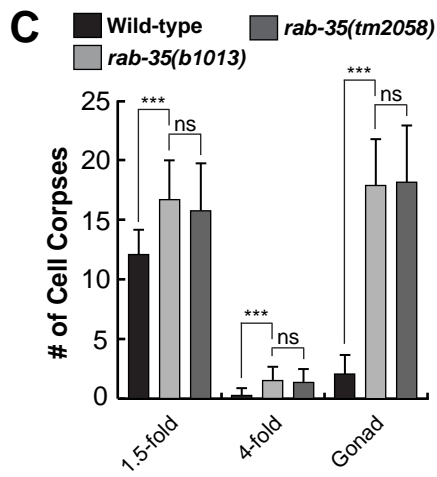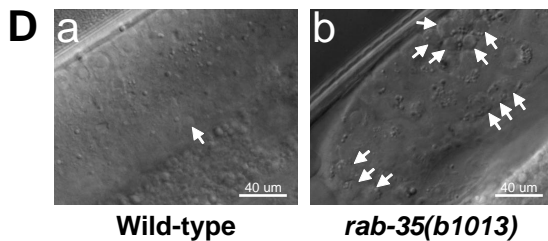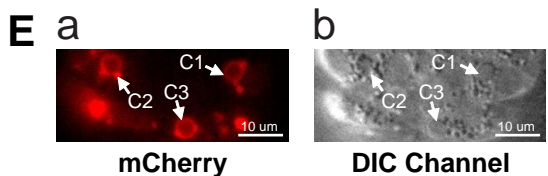

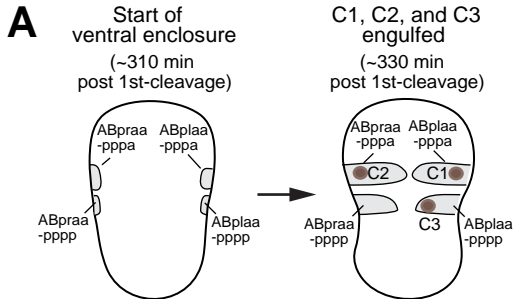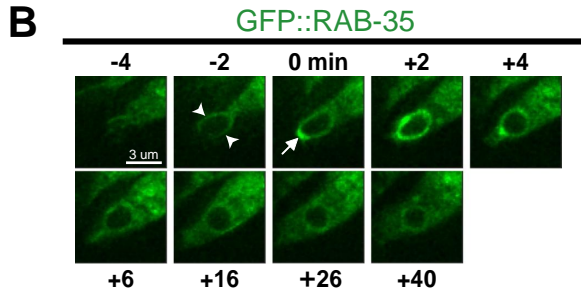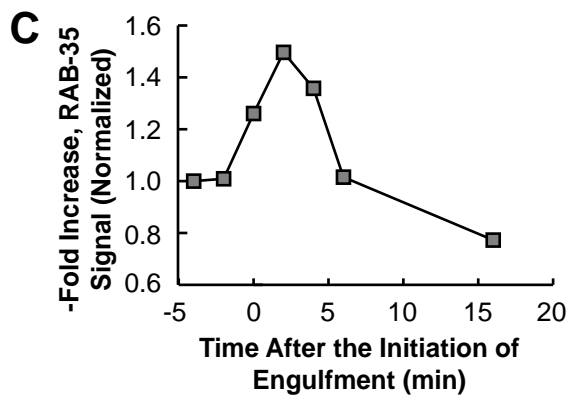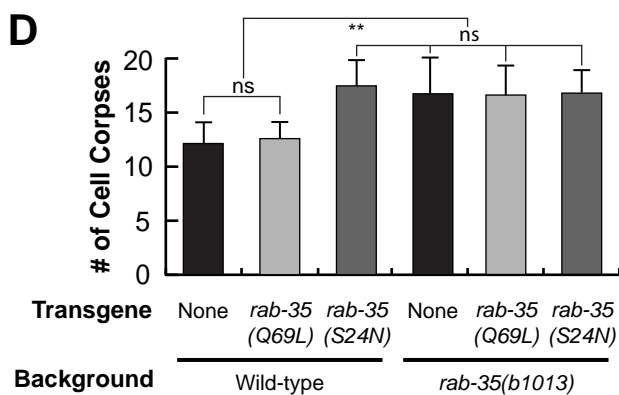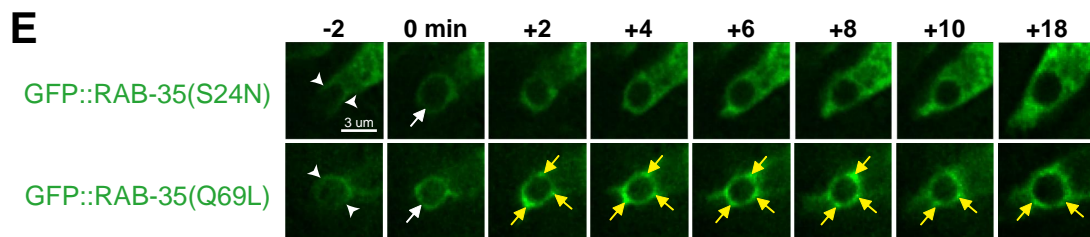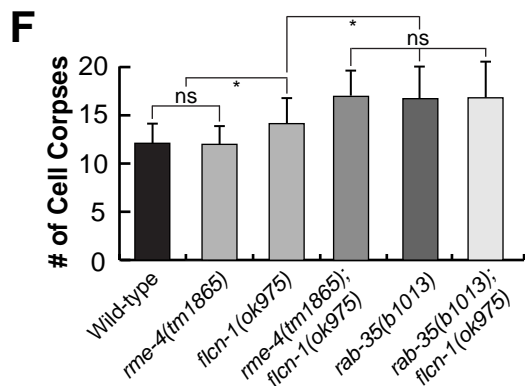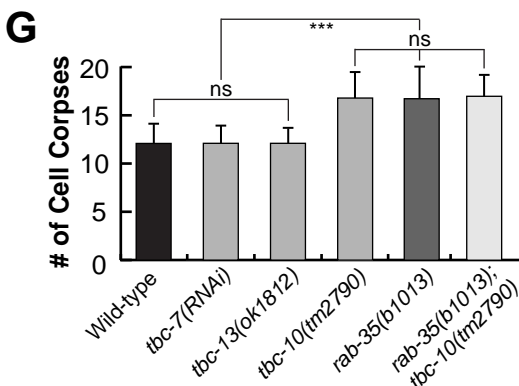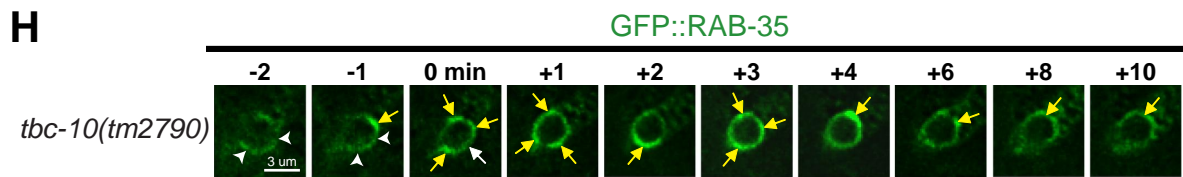

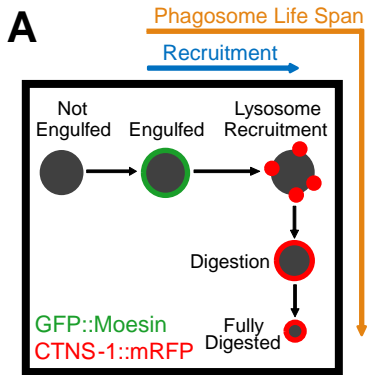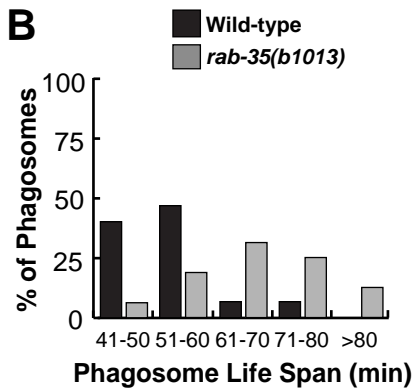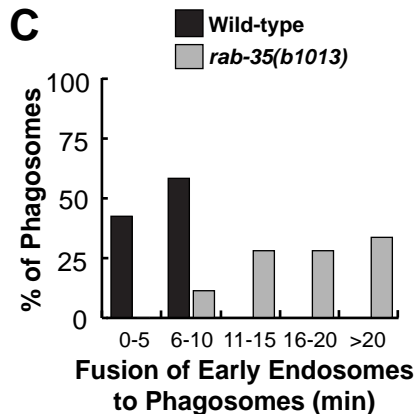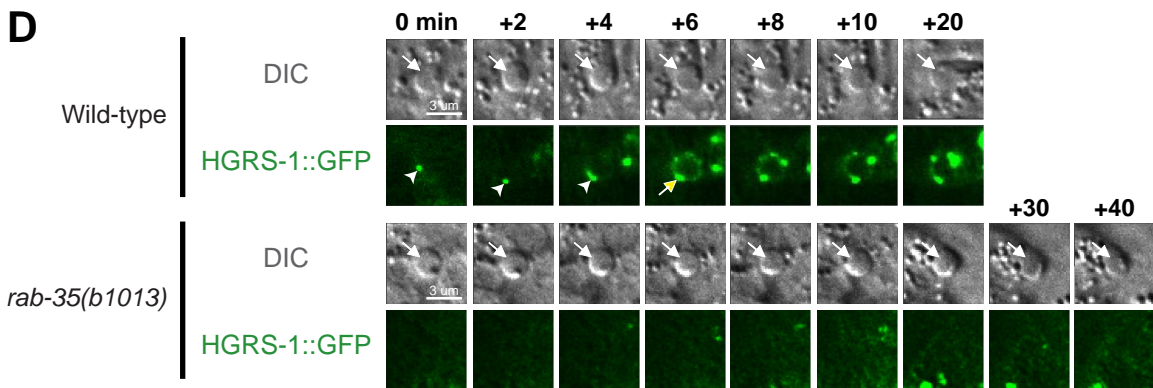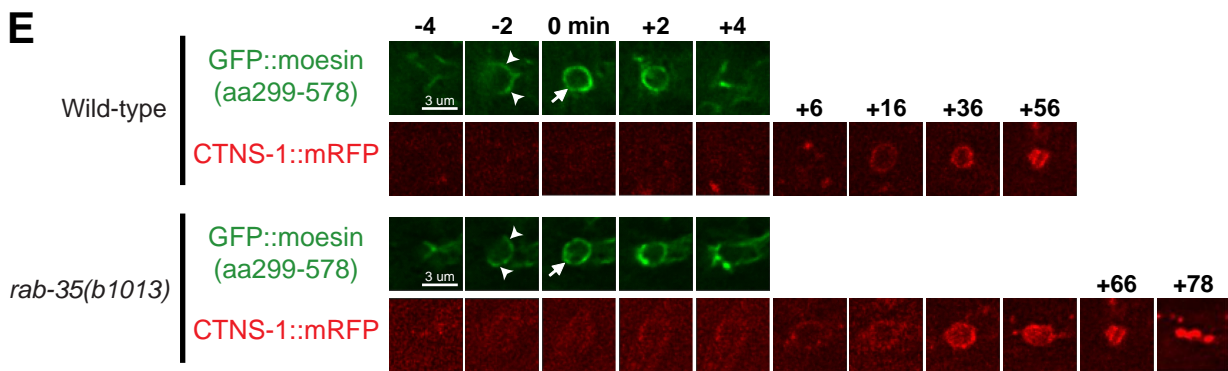



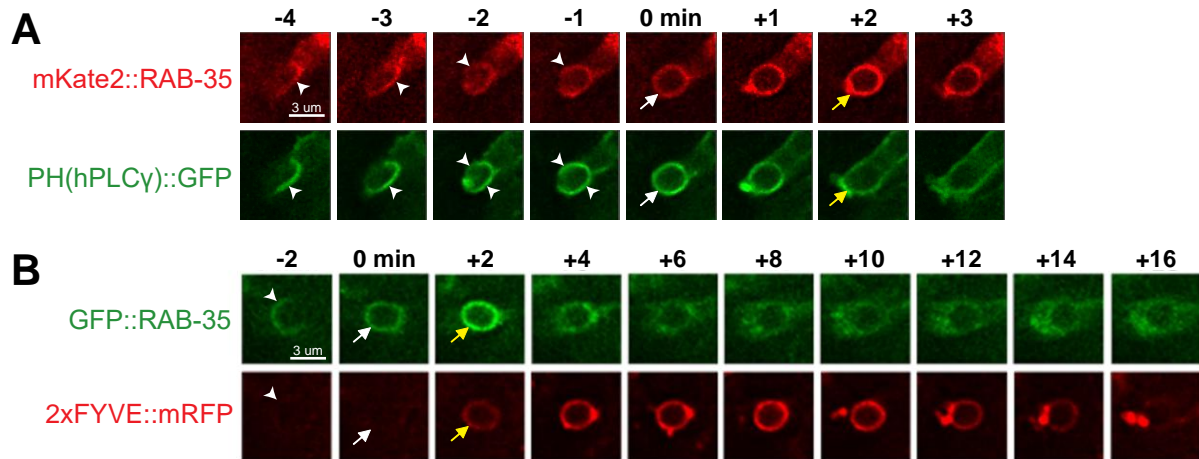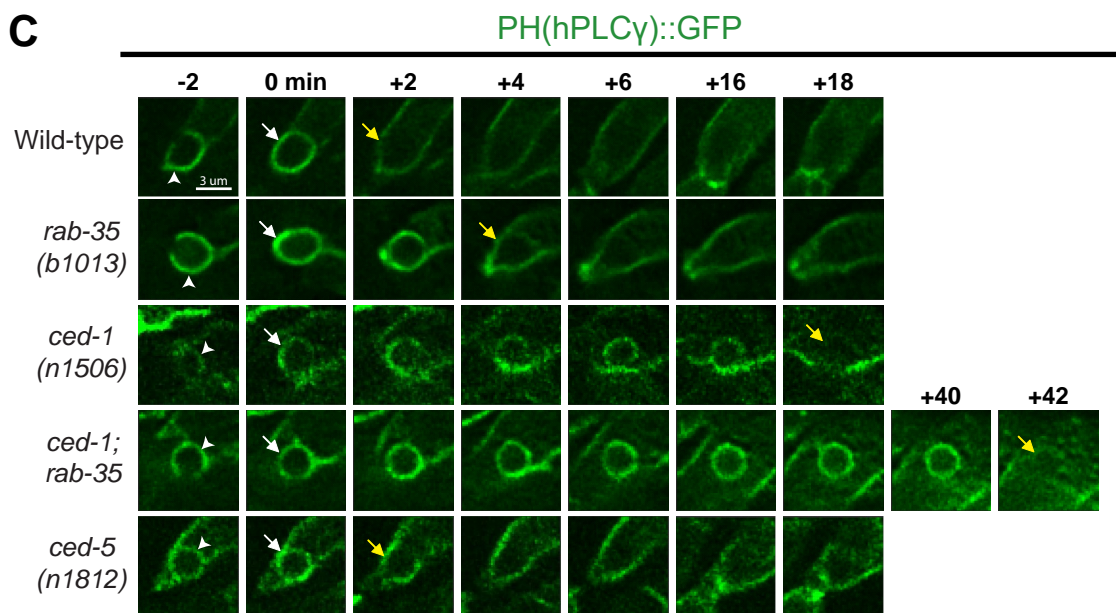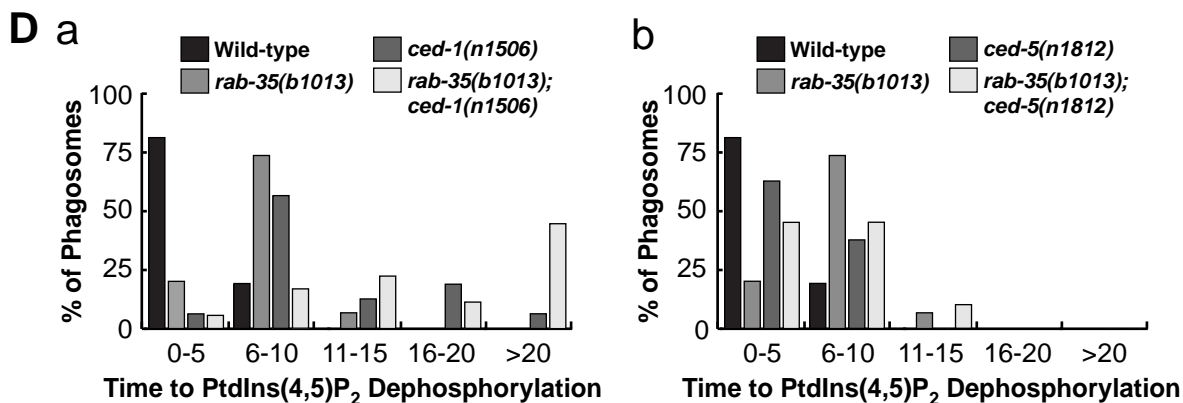



**A**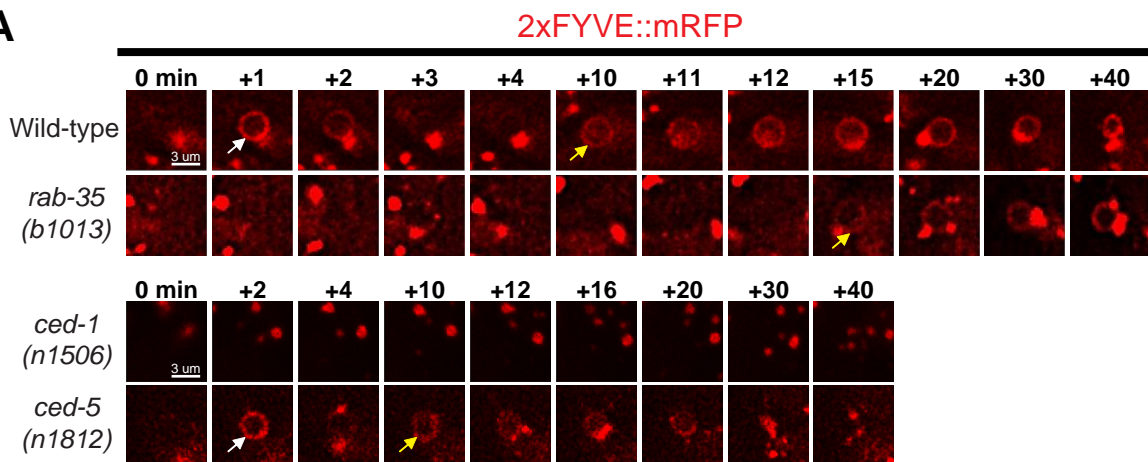**B**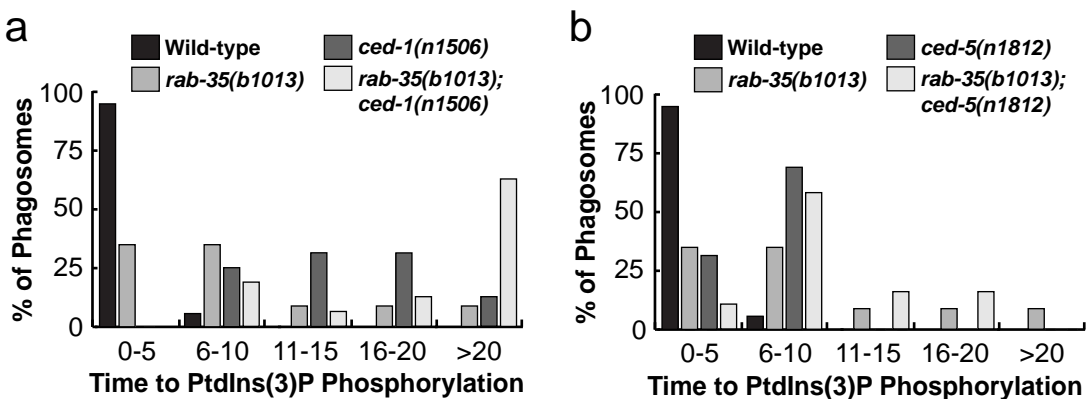**C**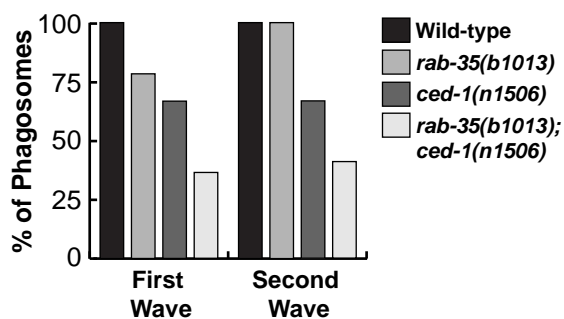

**A**

MTM-1::GFP

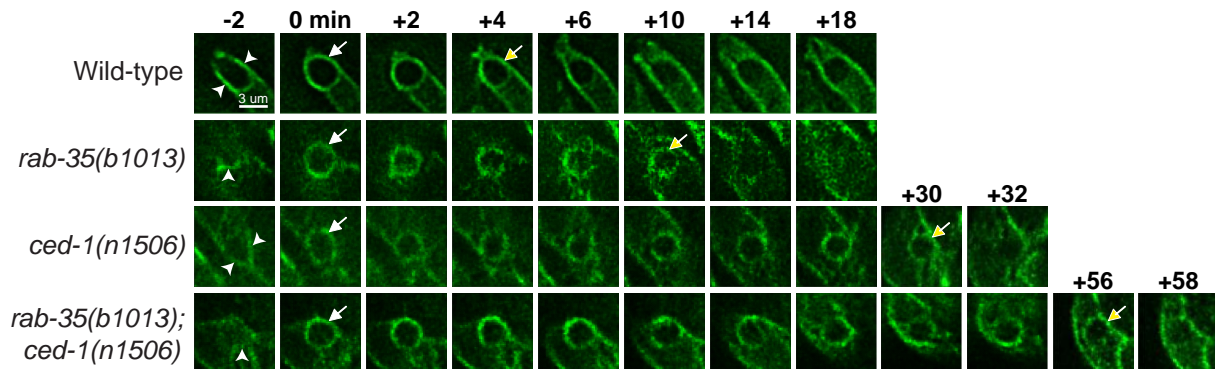**B**

SNX-1::GFP

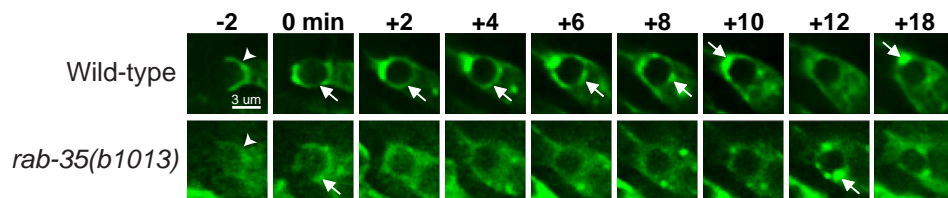**C**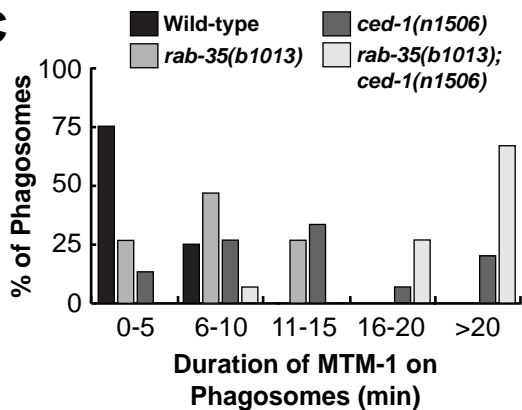**D**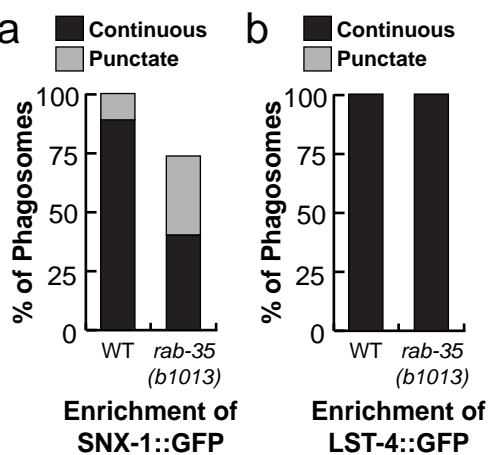

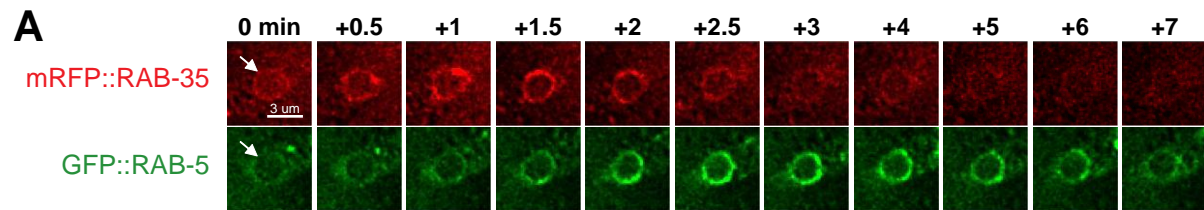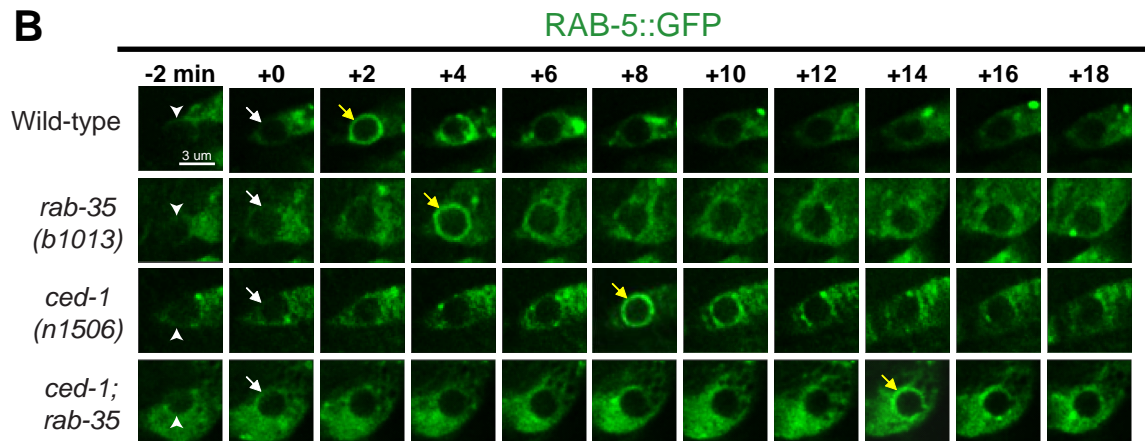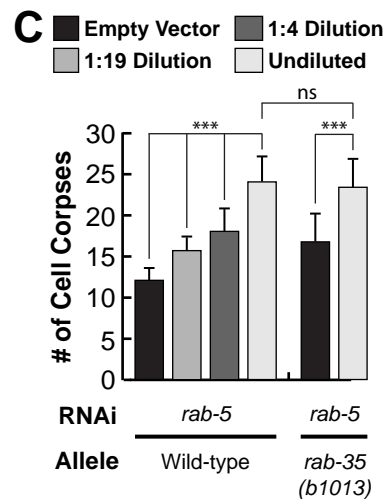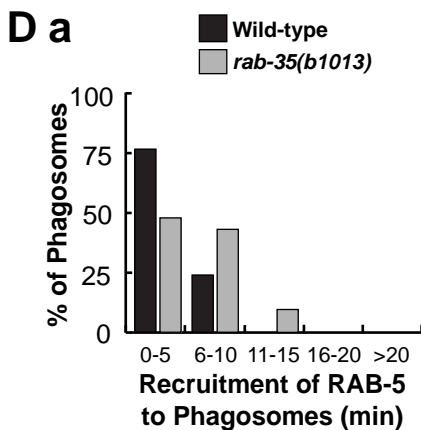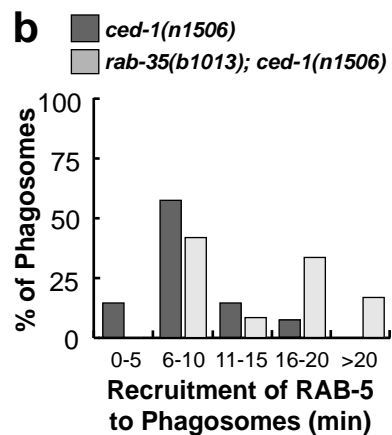

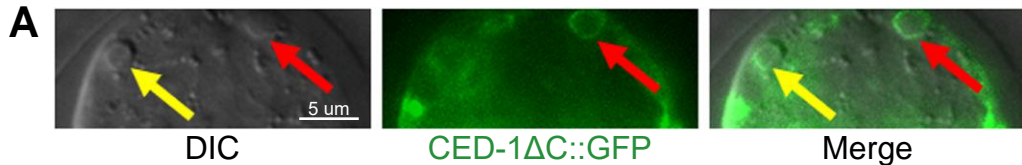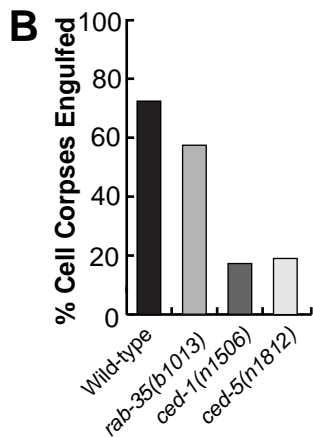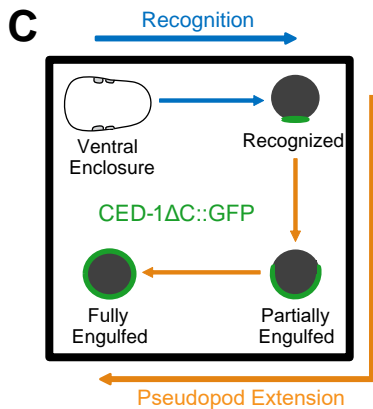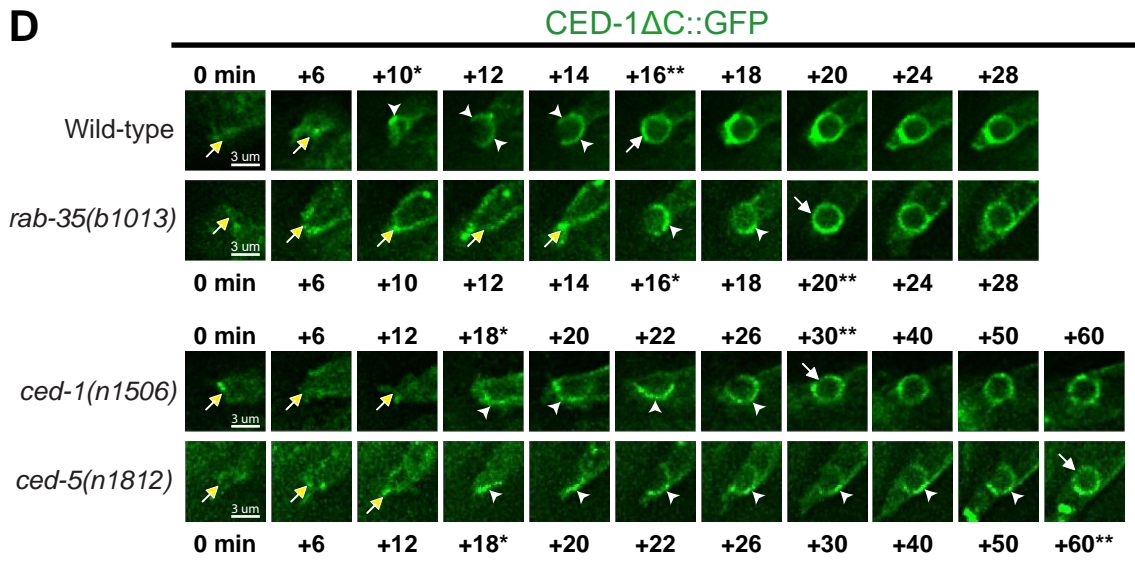

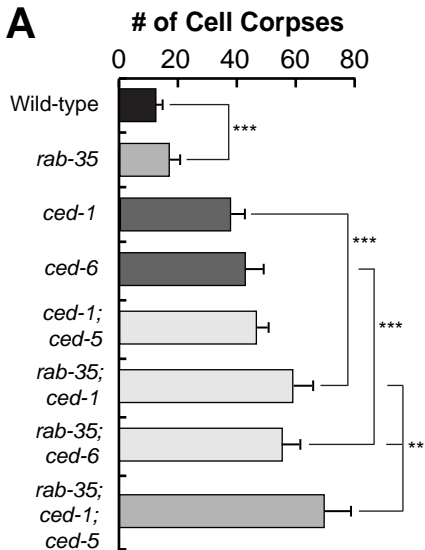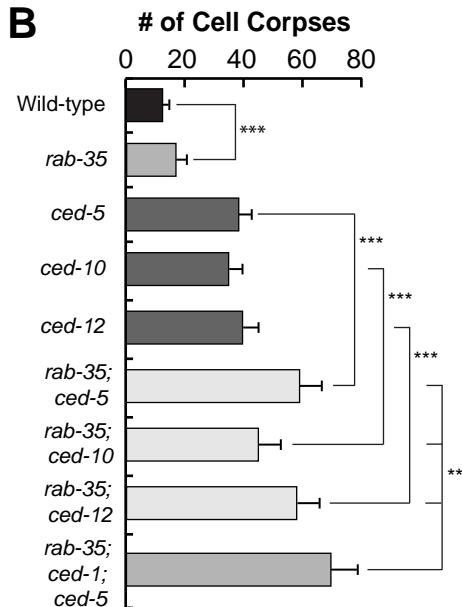

**C**

**Engulfment**

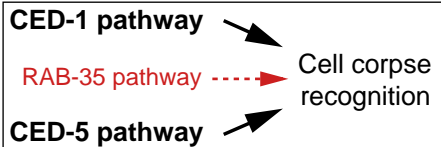

**Degradation**

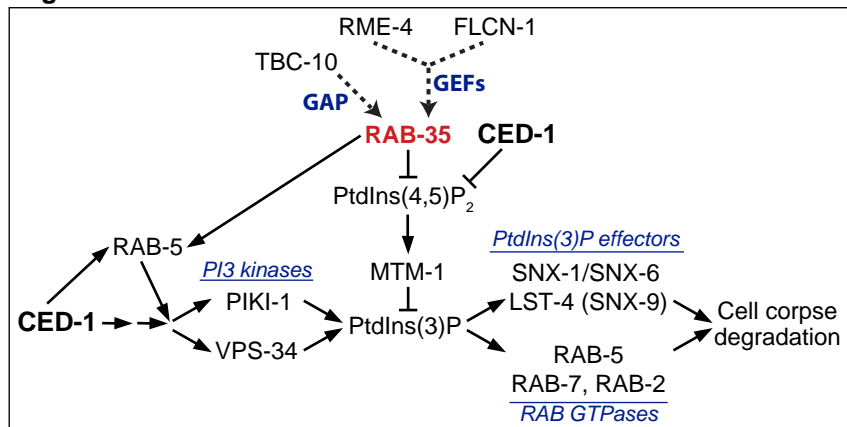

Source: http://biorxiv.org/content/10.1101/298380v1.full.pdf
